# Supplementary material for: Development of a flow photochemical process for a π-Lewis acidic metal-catalyzed cyclization/radical addition sequence: in situ-generated 2-benzopyrylium as photoredox catalyst and reactive intermediate
Source: publisher site journal article supplement (doi:10.3762/bjoc.20.173), 2024-08-13
Supplement: Additional file 1 [file 1860-5397-20-173-S1.pdf]

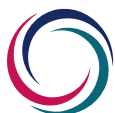

## Supporting Information

for

### **Development of a flow photochemical process for a $\pi$ -Lewis acidic metal-catalyzed cyclization/radical addition sequence: in situ-generated 2-benzopyrylium as photoredox catalyst and reactive intermediate**

Masahiro Terada, Zen Iwasaki, Ryohei Yazaki, Shigenobu Umemiya and Jun Kikuchi

*Beilstein J. Org. Chem.* **2024**, *20*, 1973–1980. [doi:10.3762/bjoc.20.173](https://doi.org/10.3762/bjoc.20.173)

### **The exploratory investigation, experimental procedures, and characterization data**

## Table of contents

|                                                                                    |     |
|------------------------------------------------------------------------------------|-----|
| 1. General information .....                                                       | S2  |
| 2. Preparation of <i>ortho</i> -carbonyl alkynylbenzene derivatives <b>1</b> ..... | S3  |
| 3. Typical procedures for the flow photochemical reaction .....                    | S8  |
| 4. Screening of reaction conditions .....                                          | S9  |
| 5. Analytical data of products <b>3</b> .....                                      | S13 |
| 6. Catalytic cycles of the sequential transformation and theoretical studies ..... | S20 |
| 7. References .....                                                                | S26 |

## 1. General information

Unless otherwise noted, all reactions were carried out under nitrogen or argon atmosphere in flame-dried glassware. Anhydrous 1,2-dichloroethane ( $C_2H_4Cl_2$ ) was purchased from Aldrich. Other solvents and reagents were purchased from commercial suppliers and used without further purification. The flow photo reactions were carried out in photo-microreactor system KeyChem-Basic series provided by YMC Co., Ltd. The syringe pump was a YSP-201 and the thermal control unit was a stand-alone Thermos Stage TS-C-R. The blue light source was HCK1012-01-002 (450 PF:  $\lambda_{max} = 450$  nm) provided by HepatoChem, Inc. These were connected each other with tubing (YMC-P-0025, inner diameter 0.5 mm). The batch reactions performed for comparison were conducted using Techno Sigma-PER-AMPs ( $\lambda_{max} = 448$  nm light source). Purification of products was carried out by flash column chromatography using silica gel 60 N (spherical, neutral, 40–50  $\mu$ m; Kanto Chemical Co., Inc.). Analytical thin layer chromatography (TLC) was performed on Merck pre-coated TLC plates (silica gel 60 GF 254, 0.25 mm).  $^1H$  NMR spectra were recorded on a JEOL ECA-600 (600 MHz) spectrometer. Chemical shifts are reported in ppm from tetramethylsilane or solvent resonance as the internal standard ( $CHCl_3$ : 7.26 ppm, TMS: 0.00 ppm).  $^{13}C\{^1H\}$  NMR spectra were recorded on a JEOL ECA-600 (151 MHz) spectrometer with complete proton decoupling. Chemical shifts are reported in ppm from the solvent resonance as the internal standard ( $CDCl_3$ : 77.0 ppm). NMR yields were determined using  $C_2H_2Br_4$  as the internal standard. Infrared spectra were recorded on a Jasco FT/IR-4100 spectrometer. Mass spectral analysis using the APCI ionization method was performed on a Bruker Daltonics SolariX 12T spectrometer and the FD method was performed using a JEOL JMS-T100GC spectrometer at the Macromolecule Research Center, Graduate School of Science, Tohoku University.

## 2. Preparation of *ortho*-carbonyl alkynylbenzene derivatives **1**

### Preparation of **S3**

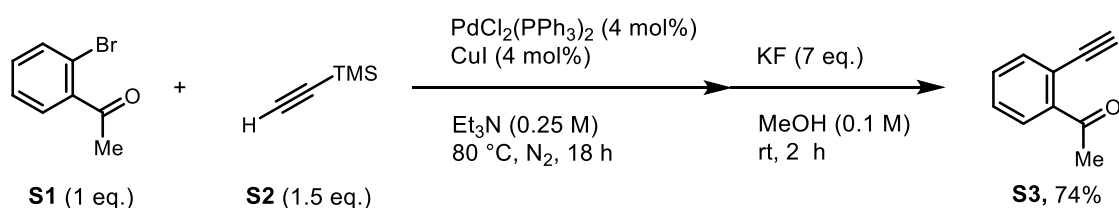

To an oven-dried three-neck flask with a magnetic stirrer bar were added  $\text{PdCl}_2(\text{PPh}_3)_2$  (276.4 mg, 4 mol %) and  $\text{CuI}$  (75.7 mg, 4 mol %). The atmosphere was replaced with nitrogen, then 2-bromoacetophenone (**S1**, 1.85 g, 1.16 mL, 10 mmol), trimethylsilylacetylene (**S2**, 1.5 g, 2.1 mL, 15 mmol), and triethylamine (40 mL) were added to the mixture, and the reaction mixture was stirred for 18 hours at 80 °C (oil bath). The reaction was quenched with aq.  $\text{NH}_4\text{Cl}$ . The resulting mixture was extracted with  $\text{EtOAc}$ , and the combined extracts were washed with  $\text{H}_2\text{O}$  and brine, dried over  $\text{Na}_2\text{SO}_4$ , and concentrated under reduced pressure after filtration. The crude product was used in the next reaction without further purification.

To the crude product was added  $\text{KF}$  (4.1 g, 70 mmol) and  $\text{MeOH}$  (100 mL), and the reaction mixture was stirred for 2 h at room temperature. The reaction was quenched with water. The resulting mixture was extracted with  $\text{EtOAc}$ , and the combined extracts were washed with brine, dried over  $\text{Na}_2\text{SO}_4$ , and concentrated under reduced pressure after filtration. The residual crude product was purified by column chromatography on silica gel (hexane/ $\text{EtOAc}$  30:1 to 20:1) to give the product **S3** as a red oil (959.1 mg, 74% yield).

### Preparation of *ortho*-alkynylmethylketone **1**

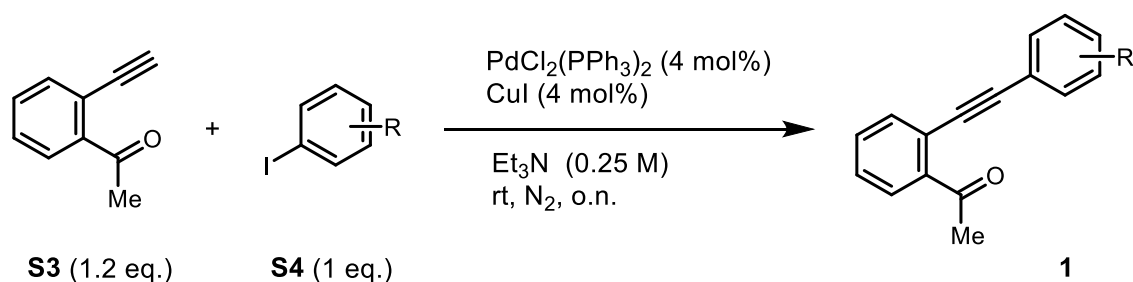

General procedure: To an oven-dried two-neck flask with a magnetic stirrer bar were added  $\text{PdCl}_2(\text{PPh}_3)_2$  (4 mol %) and  $\text{CuI}$  (4 mol %). The atmosphere was replaced with nitrogen, then 2-ethynylacetophenone (**S3**, 1.5 mmol), iodobenzene derivative **S4** (1.25 mmol) and triethylamine (5 mL) were added to the mixture, and the reaction mixture was stirred overnight at room temperature. The reaction was quenched with aq.  $\text{NH}_4\text{Cl}$ . The resulting mixture was extracted with  $\text{EtOAc}$ , and the combined extracts were washed with aq.  $\text{NH}_4\text{Cl}$ ,  $\text{H}_2\text{O}$ , and brine, dried over  $\text{Na}_2\text{SO}_4$ , and concentrated under reduced pressure after filtration. The residual crude product was purified by column chromatography on silica gel (hexane/ $\text{EtOAc}$ ) to give product **1**.

1-(2-(Phenylethynyl)phenyl)ethan-1-one (**1a**)

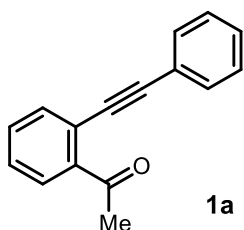

98% yield; orange oil; hexane/EtOAc = 50:1 to 20:1

All spectroscopic data for **1a** ( $^1\text{H}$  NMR,  $^{13}\text{C}\{^1\text{H}\}$  NMR, IR, and HRMS) were identical to the known compound.<sup>1</sup>

1-(2-((4-Methoxyphenyl)ethynyl)phenyl)ethan-1-one (**1b**)

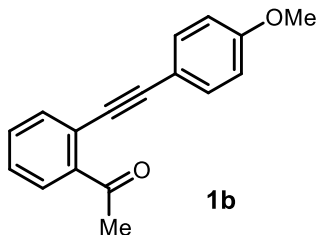

96% yield; orange oil; hexane/EtOAc = 30:1 to 5:1

All spectroscopic data for **1b** ( $^1\text{H}$  NMR,  $^{13}\text{C}\{^1\text{H}\}$  NMR, IR, and HRMS) were identical to the known compound.<sup>1</sup>

1-(2-(*p*-Tolylethynyl)phenyl)ethan-1-one (**1c**)

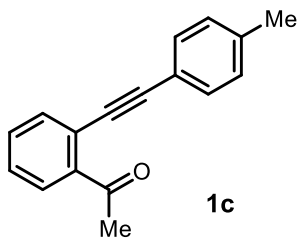

82% yield; orange solid; hexane/EtOAc = 30:1 to 5:1

All spectroscopic data for **1c** ( $^1\text{H}$  NMR,  $^{13}\text{C}\{^1\text{H}\}$  NMR, IR, and HRMS) were identical to the known compound.<sup>1</sup>

1-(2-((4-Bromophenyl)ethynyl)phenyl)ethan-1-one (**1d**)

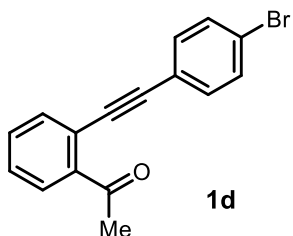

86% yield; yellow solid; hexane/EtOAc = 30:1 to 10:1

All spectroscopic data for **1d** ( $^1\text{H}$  NMR,  $^{13}\text{C}\{^1\text{H}\}$  NMR, IR, and HRMS) were identical to the known compound.<sup>2</sup>

1-(2-((4-(Trifluoromethyl)phenyl)ethynyl)phenyl)ethan-1-one (**1e**)

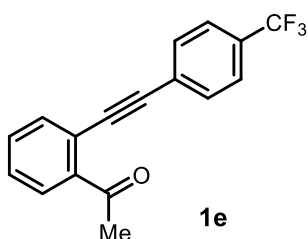

89% yield; orange oil; hexane/EtOAc = 25:1 to 10:1

All spectroscopic data for **1e** ( $^1\text{H}$  NMR,  $^{13}\text{C}\{^1\text{H}\}$  NMR, IR, and HRMS) were identical to the known compound.<sup>1</sup>

1-(2-((3-Methoxyphenyl)ethynyl)phenyl)ethan-1-one (**1f**)

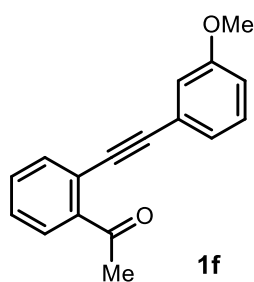

90% yield; orange oil; hexane/EtOAc = 25:1 to 10:1

All spectroscopic data for **1f** ( $^1\text{H}$  NMR,  $^{13}\text{C}\{^1\text{H}\}$  NMR, IR, and HRMS) were identical to the known compound.<sup>3</sup>

1-(2-(*m*-Tolylethynyl)phenyl)ethan-1-one (**1g**)

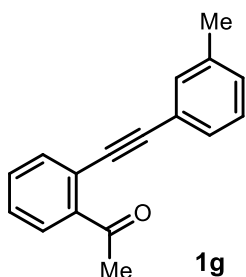

95% yield; yellow oil; hexane/EtOAc = 30:1 to 5:1

All spectroscopic data for **1g** ( $^1\text{H}$  NMR,  $^{13}\text{C}\{^1\text{H}\}$  NMR, IR, and HRMS) were identical to the known compound.<sup>2</sup>

1-(2-((3-Bromophenyl)ethynyl)phenyl)ethan-1-one (**1h**)

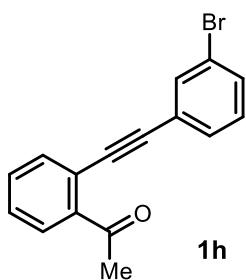

88% yield; orange oil; hexane/EtOAc = 25:1 to 10:1

All spectroscopic data for **1h** ( $^1\text{H}$  NMR,  $^{13}\text{C}\{^1\text{H}\}$  NMR, IR, and HRMS) were identical to the known compound.<sup>2</sup>

1-(2-((3-(Trifluoromethyl)phenyl)ethynyl)phenyl)ethan-1-one (**1i**)

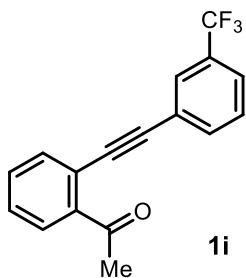

92% yield; orange oil; hexane/EtOAc = 25:1 to 5:1;  $R_f$  = 0.4 (hexane/EtOAc = 5/1);  $^1\text{H}$  NMR (600 MHz,  $\text{CDCl}_3$ )  $\delta$  7.81 (s, 1H), 7.78 (dd,  $J$  = 8.3, 1.4 Hz, 1H), 7.73 (dd,  $J$  = 7.6 Hz, 1H), 7.65 (dd,  $J$  = 8.3, 1.4 Hz, 1H), 7.61 (d,  $J$  = 7.6 Hz, 1H), 7.52-7.48 (m, 2H), 7.44 (td,  $J$  = 7.6, 1.4 Hz, 1H), 2.76 (s, 3H);  $^{13}\text{C}\{^1\text{H}\}$  NMR (151MHz,  $\text{CDCl}_3$ )  $\delta$  199.8, 140.6, 134.7, 134.1, 131.4, 131.0 (q,  $J_{\text{C-F}}$  = 31.8 Hz), 129.0, 128.9, 128.7, 128.2 (q,  $J_{\text{C-F}}$  = 3.9 Hz), 125.2 (q,  $J_{\text{C-F}}$  = 4.3 Hz), 123.9, 123.6 (q,  $J_{\text{C-F}}$  = 271.7 Hz), 121.0, 92.9, 89.9, 29.6; IR (neat): 3065, 2981, 2916, 1688,

1489, 1430, 1336, 1165, 1122, 1091, 1071, 892, 803, 759, 695  $\text{cm}^{-1}$ ; HRMS (FD)  $m/z$ :  $[\text{M}]^+$  Calcd for  $\text{C}_{17}\text{H}_{11}\text{F}_3\text{O}$  288.0757; Found 288.0761.

1-(2-(*o*-Tolylethynyl)phenyl)ethan-1-one (**1j**)

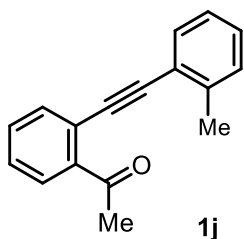

89% yield; yellow oil; hexane/EtOAc = 25:1 to 5:1;  $R_f = 0.27$  (hexane/EtOAc = 15/1);  $^1\text{H NMR}$  (600 MHz,  $\text{CDCl}_3$ )  $\delta$  7.74 (d,  $J = 7.9$  Hz, 1H), 7.64 (d,  $J = 7.6$  Hz, 1H), 7.51 (d,  $J = 7.9$  Hz, 1H), 7.47 (t,  $J = 7.6$  Hz, 1H), 7.39 (t,  $J = 7.6$  Hz, 1H), 7.31-7.27 (m, 2H), 7.20-7.17 (m, 1H), 2.78 (s, 3H), 2.54 (s, 3H);  $^{13}\text{C}\{^1\text{H}\}$  NMR (151 MHz,  $\text{CDCl}_3$ )  $\delta$  200.3, 140.4, 140.3, 134.0, 131.9, 131.2, 129.6, 128.8, 128.6, 128.1, 125.6, 122.6, 121.9, 94.0, 92.1, 29.9, 20.7; IR (neat): 3060, 3021, 2921, 2861, 2209, 1922, 1830, 1686, 1591, 1561, 1488, 1356, 1278, 1244, 955, 795  $\text{cm}^{-1}$ ; HRMS (APCI)  $m/z$ :  $[\text{M} + \text{H}]^+$  Calcd for  $\text{C}_{17}\text{H}_{15}\text{O}$  235.1117; Found 235.1118.

1-(4-Fluoro-2-(phenylethynyl)phenyl)ethan-1-one (**1k**)

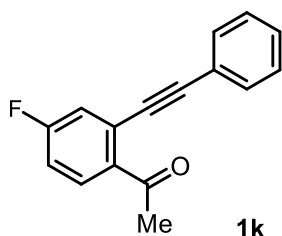

78% yield; yellow oil; hexane/EtOAc = 25:1 to 10:1  
All spectroscopic data for **1k** ( $^1\text{H NMR}$ ,  $^{13}\text{C}\{^1\text{H}\}$  NMR, IR, and HRMS) were identical to the known compound.<sup>4</sup>

1-(5-Fluoro-2-(phenylethynyl)phenyl)ethan-1-one (**1l**)

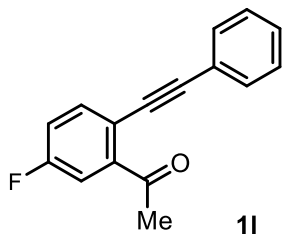

80% yield; yellow oil; hexane/EtOAc = 25:1 to 10:1  
All spectroscopic data for **1l** ( $^1\text{H NMR}$ ,  $^{13}\text{C}\{^1\text{H}\}$  NMR, IR, and HRMS) were identical to the known compound.<sup>5</sup>

Phenyl(2-(phenylethynyl)phenyl)methanone (**1m**)

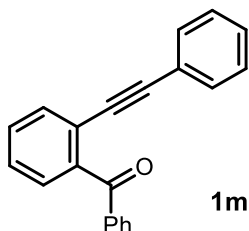

92% yield; yellow oil; hexane/EtOAc = 30:1 to 5:1  
All spectroscopic data for **1m** ( $^1\text{H NMR}$ ,  $^{13}\text{C}\{^1\text{H}\}$  NMR, IR, and HRMS) were identical to the known compound.<sup>6</sup>

2-(Phenylethynyl)benzaldehyde (**1n**)

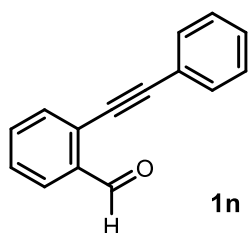

58% yield; yellow oil; hexane/EtOAc = 30:1 to 5:1

All spectroscopic data for **1n** ( $^1\text{H}$  NMR,  $^{13}\text{C}\{^1\text{H}\}$  NMR, IR, and HRMS) were identical to the known compound.<sup>7</sup>

2-(*p*-Tolylethynyl)benzaldehyde (**1o**)

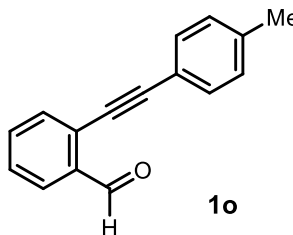

70% yield; yellow solid; hexane/EtOAc = 25:1 to 10:1

All spectroscopic data for **1o** ( $^1\text{H}$  NMR,  $^{13}\text{C}\{^1\text{H}\}$  NMR, IR, and HRMS) were identical to the known compound.<sup>8</sup>

2-((4-Bromophenyl)ethynyl)benzaldehyde (**1p**)

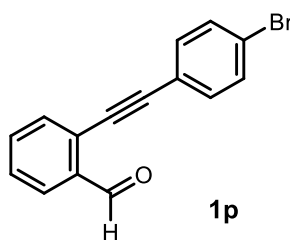

82% yield; white solid; hexane/EtOAc = 25:1 to 10:1

All spectroscopic data for **1p** ( $^1\text{H}$  NMR,  $^{13}\text{C}\{^1\text{H}\}$  NMR, IR, and HRMS) were identical to the known compound.<sup>9</sup>

2-((4-(Trifluoromethyl)phenyl)ethynyl)benzaldehyde (**1q**)

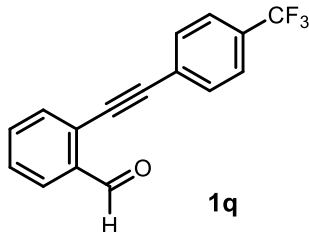

65% yield; white solid; hexane/EtOAc = 25:1 to 10:1

All spectroscopic data for **1q** ( $^1\text{H}$  NMR,  $^{13}\text{C}\{^1\text{H}\}$  NMR, IR, and HRMS) were identical to the known compound.<sup>8</sup>

2-(*o*-Tolylethynyl)benzaldehyde (**1r**)

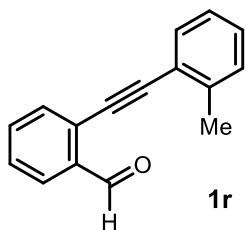

76% yield; yellow solid; hexane/EtOAc = 25:1 to 5:1;  $R_f$  = 0.33 (hexane/EtOAc = 15/1); Mp: 42.1-42.5 °C;  $^1\text{H}$  NMR (600 MHz,  $\text{CDCl}_3$ )  $\delta$  10.68 (s, 1H), 7.96 (d,  $J$  = 7.9 Hz, 1H), 7.66 (d,  $J$  = 7.6 Hz, 1H), 7.61 (t,  $J$  = 7.6 Hz, 1H), 7.54 (d,  $J$  = 7.6 Hz, 1H), 7.46 (t,  $J$  = 7.6 Hz, 1H), 7.28 (m, 2H), 7.21 (t,  $J$  = 7.6 Hz, 1H), 2.54 (s, 3H);  $^{13}\text{C}\{^1\text{H}\}$  NMR (151 MHz,  $\text{CDCl}_3$ )  $\delta$  191.6, 140.3, 135.6, 133.8, 133.3, 132.1, 129.6, 129.1, 128.5, 127.2, 127.1, 125.7, 122.1, 95.3, 88.7, 20.9; IR (neat): 3064, 2921, 2839, 2745, 2212, 1868, 1698, 1593, 1490, 1265, 1193, 795, 760  $\text{cm}^{-1}$ ; HRMS (APCI)  $m/z$ :  $[\text{M} + \text{H}]^+$  Calcd for  $\text{C}_{16}\text{H}_{13}\text{O}$  221.0961; Found 221.0961.



### 3. Typical procedures for the flow photochemical reaction

#### General procedure

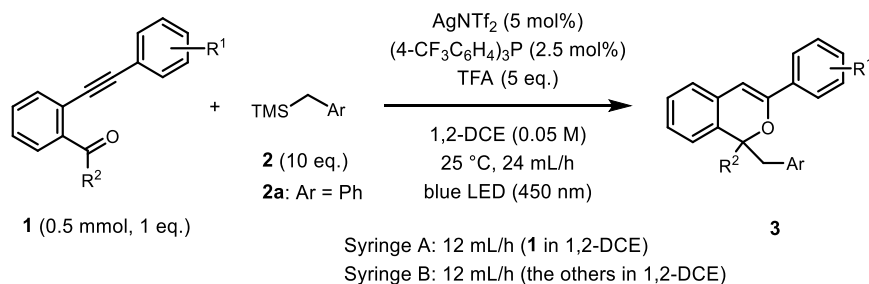

To a dried two-neck flask were added AgNTf<sub>2</sub> (9.7 mg, 5 mol %) and (4-CF<sub>3</sub>C<sub>6</sub>H<sub>4</sub>)<sub>3</sub>P (5.9 mg, 2.5 mol%). Then, 1,2-dichloroethane (4.6 mL), benzyltrimethylsilane (**2a**, 690 μL, 5 mmol), and TFA (190 μL, 2.5 mmol) were added to the mixture. The resulting mixture was filled into syringe B. On the other hand, the solution of *ortho*-carbonyl alkynylbenzene derivative **1** (0.5 mmol) in 1,2-dichloroethane (5.4 mL) was filled into syringe A. Each syringe was set into a syringe pump and the flow rate of each syringe pump was set to half the flow rate in the reactor. This was due to achieve the indicated flow rate in the reactor. A light source (blue LED: λ<sub>max</sub> = 450 nm) was placed at the top of the flow reactor. Before starting the flow reaction, the flow reactor was filled with 1,2-dichloroethane solvent and then the flow reaction started under light irradiation. The solution discharged from the flow reactor was immediately quenched with NaHCO<sub>3</sub> solution (see Figures S1 and S2). After pumping the solution in the syringe, all the remaining solution in the flow reactor was drained using 1,2-dichloroethane while irradiating with light. After the solution was discharged, the collected mixture was separated from the aqueous layer, the aqueous layer was extracted with dichloromethane, and the combined organic layers were concentrated under reduced pressure. The residual crude product was purified by column chromatography on silica gel (pure hexane to hexane/EtOAc 30:1) to give product **3**.

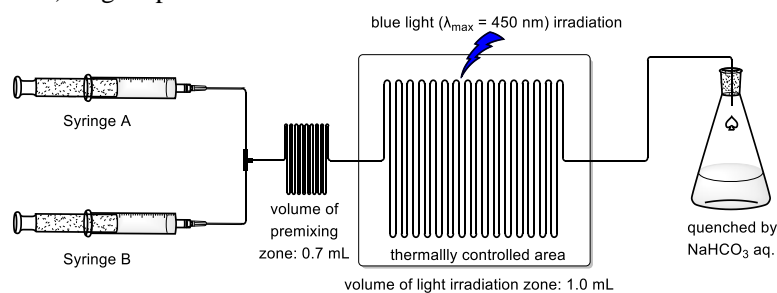

Figure S1. Flow system with premixing zone.

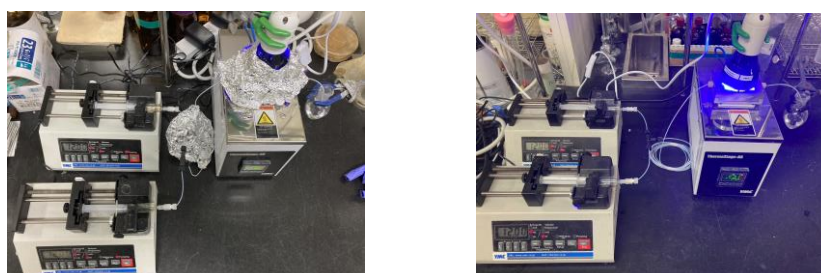

Figure S2. Photo of flow system with premixing zone.

#### 4. Screening of reaction conditions

Since it is necessary to perform a  $\pi$ -Lewis acidic metal-catalyzed cyclization prior to the photoreaction, a method of separating the substrate, catalyst, and reagents into two syringes and mixing them before light irradiation was adopted. As shown in Table S1, several combinations were examined and the yield of **3a** was slightly lower when substrate **1a** and the silver catalyst were filled in the same syringe (entries 4 and 5) compared to the case where the substrate **1a** and the silver catalyst were filled in different syringes (entries 1–3). From these results, we decided to divide the substrate **1a** into syringe A and the others, i.e., the silver catalyst, phosphine ligand, **2a**, and TFA into syringe B, as shown in entry 1.

**Table S1.** Searching for the suitable combination of **1a**, **2a**, silver catalyst, phosphine ligand, and TFA when splitting into two syringes.

| Entry | Syringe A                                                                                                      | Syringe B                                                                                               | <b>3a</b> (%) <sup>a</sup> | Recovery of <b>1a</b> (%) <sup>a</sup> |
|-------|----------------------------------------------------------------------------------------------------------------|---------------------------------------------------------------------------------------------------------|----------------------------|----------------------------------------|
| 1     | <b>1a</b>                                                                                                      | <b>2a</b> , AgNTf <sub>2</sub> , (4-CF <sub>3</sub> C <sub>6</sub> H <sub>4</sub> ) <sub>3</sub> P, TFA | 47                         | 0                                      |
| 2     | <b>1a</b> , <b>2a</b>                                                                                          | AgNTf <sub>2</sub> , (4-CF <sub>3</sub> C <sub>6</sub> H <sub>4</sub> ) <sub>3</sub> P, TFA             | 42                         | 0                                      |
| 3     | <b>1a</b> , <b>2a</b> , TFA                                                                                    | AgNTf <sub>2</sub> , (4-CF <sub>3</sub> C <sub>6</sub> H <sub>4</sub> ) <sub>3</sub> P                  | 49                         | 0                                      |
| 4     | <b>1a</b> , <b>2a</b> , AgNTf <sub>2</sub> , (4-CF <sub>3</sub> C <sub>6</sub> H <sub>4</sub> ) <sub>3</sub> P | TFA                                                                                                     | 32                         | 0                                      |
| 5     | <b>1a</b> , AgNTf <sub>2</sub> , (4-CF <sub>3</sub> C <sub>6</sub> H <sub>4</sub> ) <sub>3</sub> P             | <b>2a</b> , TFA                                                                                         | 38                         | 2                                      |

<sup>a</sup>Determined by <sup>1</sup>H NMR analysis using 1,1,2,2-tetrabromoethane as an internal standard.

**Table S2.** Screening of flow reaction conditions

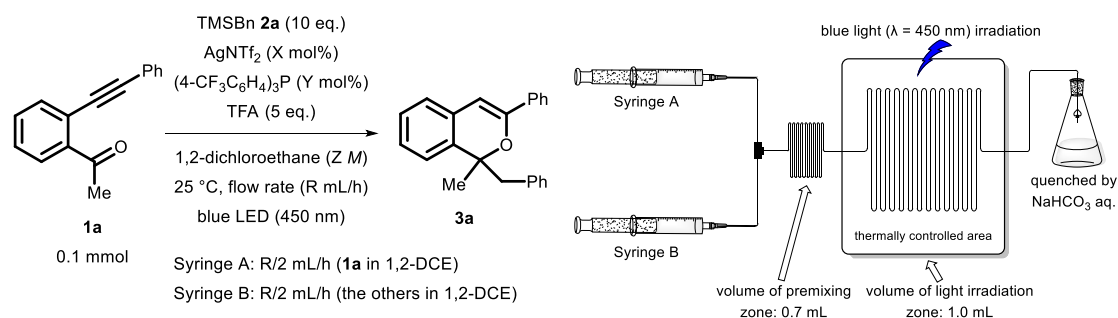

| Entry                 | AgNTf <sub>2</sub><br>(X mol %) | (CF <sub>3</sub> C <sub>6</sub> H <sub>4</sub> ) <sub>3</sub> P<br>(Y mol %) | Temp.<br>(°C) | Conc.<br>(Z, M) | Flow rate<br>R (mL/h) | Premixing<br>zone (mL) | <b>3a</b><br>(%) <sup>a</sup> | Rec. <b>1a</b><br>(%) <sup>a</sup> | Table 1<br>entry |
|-----------------------|---------------------------------|------------------------------------------------------------------------------|---------------|-----------------|-----------------------|------------------------|-------------------------------|------------------------------------|------------------|
| 1                     | 10                              | 20                                                                           | 50            | 0.1             | 3                     | none                   | 42                            | 0                                  | entry 1          |
| 2                     | 10                              | 20                                                                           | 25            | 0.1             | 3                     | none                   | 35                            | 22                                 | entry 2          |
| 3                     | 10                              | 5                                                                            | 25            | 0.1             | 3                     | none                   | 53                            | 1                                  | entry 3          |
| 4                     | 10                              | 5                                                                            | 25            | 0.1             | 6                     | none                   | 53                            | 0                                  |                  |
| 5                     | 10                              | 5                                                                            | 25            | 0.1             | 24                    | none                   | 53                            | 0                                  | entry 4          |
| 6                     | 10                              | 5                                                                            | 25            | 0.05            | 24                    | none                   | 55                            | 5                                  |                  |
| 7                     | 5                               | 2.5                                                                          | 25            | 0.1             | 24                    | none                   | 26                            | 14                                 | entry 6          |
| 8                     | 10                              | 5                                                                            | 25            | 0.1             | 24                    | 0.7                    | 52                            | 9                                  | entry 5          |
| 9                     | 10                              | 5                                                                            | 25            | 0.1             | 6                     | 0.7                    | 52                            | 1                                  |                  |
| 10                    | 10                              | 5                                                                            | 25            | 0.1             | 2                     | 0.7                    | 42                            | 0                                  |                  |
| 11                    | 5                               | 2.5                                                                          | 25            | 0.1             | 24                    | 0.7                    | 49                            | 0                                  | entry 7          |
| 12                    | 5                               | 2.5                                                                          | 25            | 0.05            | 24                    | 0.7                    | 61                            | 0                                  | entry 8          |
| 13                    | 2                               | 1                                                                            | 25            | 0.05            | 24                    | 0.7                    | 28                            | 28                                 | entry 9          |
| 14                    | 5                               | 2.5                                                                          | 25            | 0.05            | 12                    | 0.7                    | 67                            | 1                                  |                  |
| 15                    | 5                               | 2.5                                                                          | 25            | 0.05            | 6                     | 0.7                    | 57                            | 2                                  |                  |
| <b>16<sup>b</sup></b> | <b>5</b>                        | <b>2.5</b>                                                                   | <b>25</b>     | <b>0.05</b>     | <b>24</b>             | <b>0.7</b>             | <b>77</b>                     | <b>0</b>                           | <b>entry 10</b>  |
| 17 <sup>c</sup>       | 5                               | 2.5                                                                          | 25            | 0.05            | 24                    | 0.7                    | 75                            | 0                                  |                  |
| 18 <sup>b</sup>       | 5                               | 2.5                                                                          | 25            | 0.05            | 24                    | none                   | 62                            | 3                                  |                  |
| 19 <sup>b</sup>       | 5                               | 2.5                                                                          | 25            | 0.05            | 24                    | 1.1                    | 73                            | 0                                  |                  |
| 20 <sup>b</sup>       | 5                               | 2.5                                                                          | 25            | 0.05            | 24                    | 2.2                    | 67                            | 0                                  |                  |
| 21 <sup>b</sup>       | 5                               | 2.5                                                                          | 25            | 0.05            | 96                    | 1.1                    | 36                            | 0                                  |                  |

<sup>a</sup>Yield was determined by NMR analysis using 1,1,2,2-tetrabromoethane as an internal standard. <sup>b</sup>The reaction was conducted on 0.5 mmol scale. <sup>c</sup>The reaction was conducted on 1.0 mmol scale.

**Table S3.** Screening of reaction conditions in the reaction of **1b** (*p*-OMe substrate).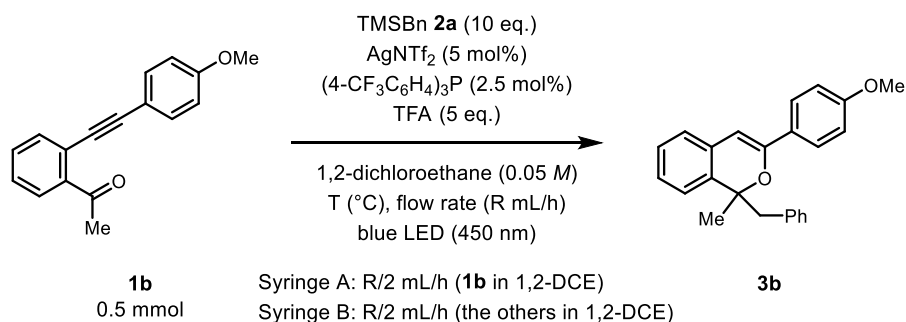

| Entry | T (°C) | Flow rate | Premixing zone | Premixing time (min) | Irradiation time (min) | <b>3b</b> (%) <sup>a</sup> | Table 2 entry |
|-------|--------|-----------|----------------|----------------------|------------------------|----------------------------|---------------|
| 1     | 25     | 24 mL/h   | 0.7 mL         | 1.7                  | 2.5                    | 14                         | entry 1       |
| 2     | 25     | 48 mL/h   | 1.4 mL         | 1.7                  | 1.3                    | 12                         |               |
| 3     | 25     | 96 mL/h   | 1.4 mL         | 0.8                  | 0.6                    | 23                         |               |
| 4     | 0      | 24 mL/h   | 0.7 mL         | 1.7                  | 2.5                    | 19                         |               |
| 5     | 0      | 12 mL/h   | 0.7 mL         | 3.3                  | 5                      | 16                         |               |
| 6     | 25     | 12 mL/h   | 0.7 mL         | 3.3                  | 5                      | 27                         |               |
| 7     | 50     | 12 mL/h   | 0.7 mL         | 3.3                  | 5                      | 28                         |               |
| 8     | 25     | 12 mL/h   | 1.1 mL         | 5.5                  | 5                      | 37                         |               |
| 9     | 25     | 24 mL/h   | 2.2 mL         | 5.5                  | 2.5                    | 20                         |               |
| 10    | 25     | 12 mL/h   | 2.2 mL         | 11                   | 5                      | 42                         |               |
| 11    | 25     | 6 mL/h    | 1.1 mL         | 11                   | 10                     | 54                         | entry 2       |
| 12    | 25     | 3 mL/h    | 1.1 mL         | 22                   | 20                     | 44                         |               |
| 13    | 25     | 12 mL/h   | 4.4 mL         | 22                   | 5                      | 40                         |               |

<sup>a</sup> Determined by <sup>1</sup>H NMR analysis using 1,1,2,2-tetrabromoethane as an internal standard. Substrate **1b** was completely consumed in all cases.

**Table S4.** Screening of reaction conditions in the reaction of **1m** (phenyl ketone substrate).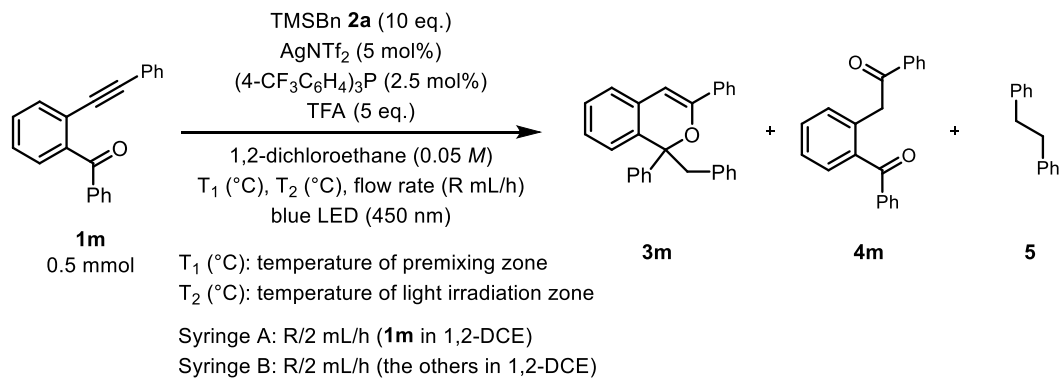

| Entry | T <sub>1</sub> (°C) | T <sub>2</sub> (°C) | Flow rate | Premixing zone | Premixing time (min) | Irradiation time (min) | <b>3m</b> <sup>a</sup> | <b>1m</b> <sup>a</sup> | <b>4m</b> <sup>a</sup> | <b>5</b> <sup>a</sup> | Table 3 entry |
|-------|---------------------|---------------------|-----------|----------------|----------------------|------------------------|------------------------|------------------------|------------------------|-----------------------|---------------|
| 1     | rt                  | 25                  | 24 mL/h   | 10 m (2.2 mL)  | 1.7                  | 2.5                    | 7%                     | 29%                    | 0%                     | 4%                    | entry 1       |
| 2     | rt                  | 25                  | 24 mL/h   | 10 m (2.2 mL)  | 5.5                  | 2.5                    | 10%                    | 23%                    | 11%                    | 2%                    |               |
| 3     | rt                  | 25                  | 12 mL/h   | 5 m (1.1 mL)   | 5.5                  | 5                      | 5%                     | 14%                    | 0%                     | 5%                    |               |
| 4     | rt                  | 5                   | 12 mL/h   | 5 m (1.1 mL)   | 5.5                  | 5                      | 4%                     | 19%                    | 4%                     | 6%                    |               |
| 5     | 50                  | 25                  | 24 mL/h   | 10 m (2.2 mL)  | 5.5                  | 2.5                    | 17%                    | 0%                     | 62%                    | 0%                    |               |
| 6     | 35                  | 25                  | 24 mL/h   | 10 m (2.2 mL)  | 5.5                  | 2.5                    | 14%                    | 0%                     | 46%                    | 1%                    |               |
| 7     | 50                  | 25                  | 6 mL/h    | 2.5 m (0.5 mL) | 5.5                  | 10                     | 19%                    | 0%                     | 2%                     | 7%                    | entry 2       |

<sup>a</sup> Determined by <sup>1</sup>H NMR analysis using 1,1,2,2-tetrabromoethane as an internal standard.

## 5. Analytical data of products **3**

### 1-Benzyl-1-methyl-3-phenyl-1*H*-isochromene (**3a**)

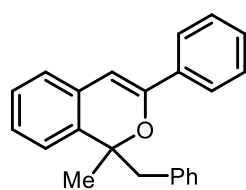

**3a**

77% yield; White foam;  $R_f = 0.59$  (Hexane/EtOAc = 10/1);  $^1\text{H NMR}$  (600 MHz,  $\text{CDCl}_3$ )  $\delta$  7.72 (d,  $J = 7.6$  Hz, 2H), 7.39-7.32 (m, 3H), 7.22 (td,  $J = 7.6, 1.4$  Hz, 1H), 7.19-7.15 (m, 3H), 7.12-7.09 (m, 2H), 6.96 (dd,  $J = 7.9, 1.4$  Hz, 2H), 6.91 (d,  $J = 7.6$  Hz, 1H), 6.47 (s, 1H), 3.22 (d,  $J = 13.8$  Hz, 1H), 3.11 (d,  $J = 13.8$  Hz, 1H), 1.71 (s, 3H);  $^{13}\text{C}\{^1\text{H}\}$  NMR (151 MHz,  $\text{CDCl}_3$ )  $\delta$  150.5, 136.5, 134.6<sub>3</sub>, 134.5<sub>9</sub>, 131.1, 130.6, 128.6, 128.2, 127.7, 127.5, 126.3<sub>1</sub>, 126.2<sub>6</sub>, 125.0, 124.1, 123.7, 100.1, 80.8, 44.9, 24.4; IR (neat): 3061, 3028, 2980, 2922, 1723, 1698, 1495, 1452, 1272, 1235, 1089, 761, 700  $\text{cm}^{-1}$ ; HRMS (FD)  $m/z$ :  $[\text{M}]^+$  Calcd for  $\text{C}_{23}\text{H}_{20}\text{O}$  312.1509; Found 312.1513.

### 1-Benzyl-3-(4-methoxyphenyl)-1-methyl-1*H*-isochromene (**3b**)

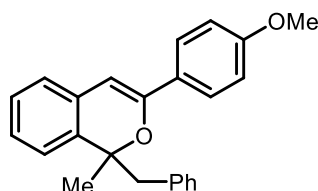

**3b**

54% yield; White foam;  $R_f = 0.57$  (Hexane/EtOAc = 10/1);  $^1\text{H NMR}$  (600 MHz,  $\text{CDCl}_3$ )  $\delta$  7.65 (dd,  $J = 6.9, 2.1$  Hz, 2H), 7.21-7.18 (m, 4H), 7.10-7.07 (m, 2H), 6.96 (dd,  $J = 7.6, 1.7$  Hz, 2H), 6.92-6.90 (m, 3H), 6.36 (s, 1H), 3.85 (s, 3H), 3.22 (d,  $J = 13.4$  Hz, 1H), 3.08 (d,  $J = 13.4$  Hz, 1H), 1.70 (s, 3H);  $^{13}\text{C}\{^1\text{H}\}$  NMR (151 MHz,  $\text{CDCl}_3$ )  $\delta$  160.1, 150.4, 136.6, 134.4, 131.1, 130.9, 127.6, 127.5, 127.2, 126.5, 126.2, 125.9, 123.8, 123.6, 113.6, 98.5, 80.7, 55.3, 44.7, 24.3; IR (neat): 3061, 3026, 2934, 2835, 1509, 1248, 1173, 1055, 1028, 932, 833, 700  $\text{cm}^{-1}$ ; HRMS (FD)  $m/z$ :  $[\text{M}]^+$  Calcd for  $\text{C}_{24}\text{H}_{22}\text{O}_2$  342.1614; Found 342.1619.

### 1-Benzyl-1-methyl-3-(*p*-tolyl)-1*H*-isochromene (**3c**)

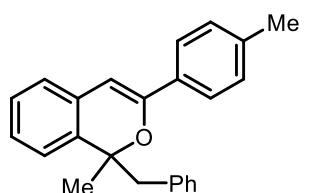

**3c**

76% yield; Colorless oil;  $R_f = 0.53$  (Hexane/EtOAc = 10/1);  $^1\text{H NMR}$  (600 MHz,  $\text{CDCl}_3$ )  $\delta$  7.61 (d,  $J = 8.2$  Hz, 2H), 7.23-7.16 (m, 6H), 7.10-7.07 (m, 2H), 6.96 (d,  $J = 6.9$  Hz, 2H), 6.90 (d,  $J = 7.6$  Hz, 1H), 6.42 (s, 1H), 3.22 (d,  $J = 13.8$  Hz, 1H), 3.10 (d,  $J = 13.8$  Hz, 1H), 2.38 (s, 3H), 1.70 (s, 3H);  $^{13}\text{C}\{^1\text{H}\}$  NMR (151 MHz,  $\text{CDCl}_3$ )  $\delta$  150.7, 138.6, 136.6, 134.6, 131.8, 131.1, 130.8, 128.9, 127.6, 127.5, 126.2, 126.1, 125.0, 124.0, 123.7, 99.3, 80.7, 44.8, 24.4, 21.3; IR (neat): 3061, 3027, 2981, 2919, 1452, 1273, 1082, 1057, 803, 748, 699  $\text{cm}^{-1}$ ; HRMS (FD)  $m/z$ :  $[\text{M}]^+$  Calcd for  $\text{C}_{24}\text{H}_{22}\text{O}$  326.1665; Found 326.1670.

1-Benzyl-3-(4-bromophenyl)-1-methyl-1*H*-isochromene (**3d**)

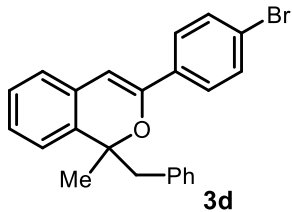

57% yield; White foam;  $R_f = 0.63$  (Hexane/EtOAc = 10/1);  $^1\text{H NMR}$  (600 MHz,  $\text{CDCl}_3$ )  $\delta$  7.56 (d,  $J = 8.6$  Hz, 2H), 7.49 (d,  $J = 8.6$  Hz, 2H), 7.24-7.16 (m, 4H), 7.15-7.10 (m, 2H), 6.95-6.93 (m, 3H), 6.45 (s, 1H), 3.21 (d,  $J = 13.8$  Hz, 1H), 3.05 (d,  $J = 13.8$  Hz, 1H), 1.70 (s, 3H);  $^{13}\text{C}\{^1\text{H}\}$  NMR (151 MHz,  $\text{CDCl}_3$ )  $\delta$  149.5, 136.3, 134.7, 133.5, 131.3, 131.0, 130.3, 127.8, 127.6, 126.7, 126.5, 126.3, 124.3, 123.7, 122.6, 100.5, 80.9, 45.0, 24.4; IR (neat): 3062, 3026, 2983, 1629, 1486, 1451, 1398, 1054, 1005, 805, 746, 700  $\text{cm}^{-1}$ ; HRMS (FD)  $m/z$ :  $[\text{M}]^+$  Calcd for  $\text{C}_{23}\text{H}_{19}\text{BrO}$  390.0614; Found 390.0618.

1-Benzyl-1-methyl-3-(4-(trifluoromethyl)phenyl)-1*H*-isochromene (**3e**)

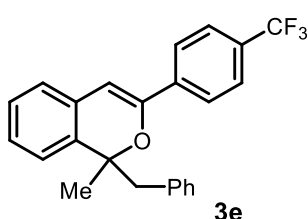

77% yield; Colorless oil;  $R_f = 0.57$  (Hexane/EtOAc = 10/1);  $^1\text{H NMR}$  (600 MHz,  $\text{CDCl}_3$ )  $\delta$  7.79 (d,  $J = 8.3$  Hz, 2H), 7.61 (d,  $J = 8.6$  Hz, 2H), 7.24 (td,  $J = 7.7, 1.4$  Hz, 1H), 7.22-7.12 (m, 5H), 6.96 (d,  $J = 7.6$  Hz, 1H), 6.94 (d,  $J = 6.9$  Hz, 2H), 6.53 (s, 1H), 3.22 (d,  $J = 13.8$  Hz, 1H), 3.08 (d,  $J = 13.8$  Hz, 1H), 1.72 (s, 3H);  $^{13}\text{C}\{^1\text{H}\}$  NMR (151 MHz,  $\text{CDCl}_3$ )  $\delta$  149.0, 138.0, 136.3, 134.9, 131.0, 130.1 (q,  $J_{\text{C-F}} = 31.8$  Hz), 130.0, 127.8, 127.6, 127.1, 126.4, 125.2 (q,  $J_{\text{C-F}} = 4.3$  Hz), 125.1 (q,  $J_{\text{C-F}} = 271.5$  Hz), 125.0, 124.6, 123.7, 101.9, 81.1, 45.1, 24.5; IR (neat): 3063, 3028, 2983, 1733, 1615, 1453, 1411, 1321, 1164, 1110, 1014, 851, 807, 750, 700  $\text{cm}^{-1}$ ; HRMS (FD)  $m/z$ :  $[\text{M}]^+$  Calcd for  $\text{C}_{24}\text{H}_{19}\text{F}_3\text{O}$  380.1383; Found 380.1387.

1-Benzyl-3-(3-methoxyphenyl)-1-methyl-1*H*-isochromene (**3f**)

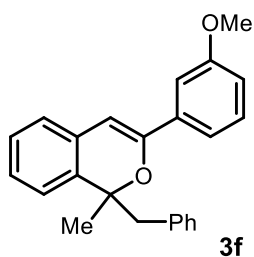

39% yield; Colorless oil;  $R_f = 0.57$  (Hexane/EtOAc = 10/1);  $^1\text{H NMR}$  (600 MHz,  $\text{CDCl}_3$ )  $\delta$  7.33 (dt,  $J = 7.8, 1.3$  Hz, 1H), 7.29 (t,  $J = 7.9$  Hz, 1H), 7.24-7.17 (m, 5H), 7.12-7.10 (m, 2H), 6.99-6.97 (m, 2H), 6.92 (d,  $J = 7.9$  Hz, 1H), 6.89 (m, 1H), 6.46 (s, 1H), 3.82 (s, 3H), 3.23 (d,  $J = 13.4$  Hz, 1H), 3.11 (d,  $J = 13.4$  Hz, 1H), 1.69 (s, 3H);  $^{13}\text{C}\{^1\text{H}\}$  NMR (151 MHz,  $\text{CDCl}_3$ )  $\delta$  159.6, 150.3, 136.5, 136.1, 134.8, 131.1, 130.6, 129.1, 127.7, 127.6, 126.4, 126.3, 124.2, 123.6, 117.5, 114.4, 110.3, 100.4, 80.8, 55.3, 44.8, 24.4; IR (neat): 3064, 3030, 2937, 2834, 1748, 1670, 1647, 1630, 1604, 1542, 1508, 1489, 1452, 1429, 1322, 1229, 1171, 1061, 784, 719, 671, 658  $\text{cm}^{-1}$ ; HRMS (APCI)  $m/z$ :  $[\text{M} + \text{H}]^+$  Calcd for  $\text{C}_{24}\text{H}_{23}\text{O}$  343.1693; Found 343.1693.

1-Benzyl-1-methyl-3-(*m*-tolyl)-1*H*-isochromene (**3g**)

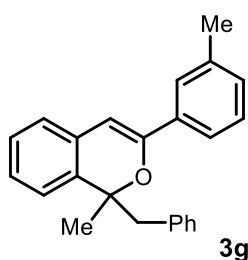

75% yield; Colorless oil;  $R_f = 0.49$  (Hexane/EtOAc = 10/1);  $^1\text{H NMR}$  (600 MHz,  $\text{CDCl}_3$ )  $\delta$  7.53 (d,  $J = 7.6$  Hz, 1H), 7.52 (s, 1H), 7.27 (t,  $J = 7.6$  Hz, 1H), 7.23-7.15 (m, 5H), 7.12-7.09 (m, 2H), 6.97 (d,  $J = 6.5$  Hz, 2H), 6.91 (d,  $J = 7.6$  Hz, 1H), 6.46 (s, 1H), 3.22 (d,  $J = 13.8$  Hz, 1H), 3.11 (d,  $J = 13.8$  Hz, 1H), 2.38 (s, 3H), 1.71 (s, 3H);  $^{13}\text{C}\{^1\text{H}\}$  NMR (151 MHz,  $\text{CDCl}_3$ )  $\delta$  150.6, 137.8, 136.6, 134.7, 134.5, 131.1, 130.7, 129.4, 128.1, 127.7, 127.5, 126.3, 126.2, 125.7, 124.1, 123.7, 122.2, 100.0, 80.7, 44.8, 24.4, 21.5; IR (neat): 3058, 3026, 2998, 2988, 2938, 2910, 1600, 1485, 1454, 1080, 1061, 1032, 808, 782, 767, 748, 716, 700, 691  $\text{cm}^{-1}$ ; HRMS (FD)  $m/z$ :  $[\text{M}]^+$  Calcd for  $\text{C}_{24}\text{H}_{22}\text{O}$  326.1665; Found 326.1670.

1-Benzyl-3-(3-bromophenyl)-1-methyl-1*H*-isochromene (**3h**)

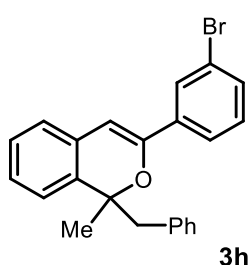

68% yield; Yellow oil;  $R_f = 0.57$  (Hexane/EtOAc = 10/1);  $^1\text{H NMR}$  (600 MHz,  $\text{CDCl}_3$ )  $\delta$  7.83 (t,  $J = 1.9$  Hz, 1H), 7.63 (d,  $J = 7.9$  Hz, 1H), 7.45 (m, 1H), 7.25-7.17 (m, 5H), 7.15-7.11 (m, 2H), 6.96-6.93 (m, 3H), 6.46 (s, 1H), 3.21 (d,  $J = 13.7$  Hz, 1H), 3.08 (d,  $J = 13.7$  Hz, 1H), 1.71 (s, 3H);  $^{13}\text{C}\{^1\text{H}\}$  NMR (151 MHz,  $\text{CDCl}_3$ )  $\delta$  149.0, 136.7, 136.3, 134.8, 131.4, 131.0, 130.2, 129.7, 128.0, 127.8, 127.6, 126.8, 126.4, 124.4, 123.7, 123.4, 122.6, 101.1, 81.0, 45.0, 24.4; IR (neat): 3062, 3027, 2981, 2917, 1557, 1485, 1474, 1452, 1240, 1079, 1058, 1031, 781, 746, 700, 685  $\text{cm}^{-1}$ ; HRMS (FD)  $m/z$ :  $[\text{M}]^+$  Calcd for  $\text{C}_{23}\text{H}_{19}\text{BrO}$  390.0614; Found 390.0618.

1-Benzyl-1-methyl-3-(3-(trifluoromethyl)phenyl)-1*H*-isochromene (**3i**)

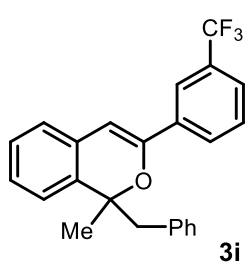

65% yield; Colorless oil;  $R_f = 0.56$  (Hexane/EtOAc = 10/1);  $^1\text{H NMR}$  (600 MHz,  $\text{CDCl}_3$ )  $\delta$  7.92 (s, 1H), 7.87 (d,  $J = 7.9$  Hz, 1H), 7.58 (d,  $J = 7.6$  Hz, 1H), 7.49 (t,  $J = 7.7$  Hz, 1H), 7.25-7.14 (m, 6H), 6.98-6.96 (m, 3H), 6.53 (s, 1H), 3.25 (d,  $J = 13.7$  Hz, 1H), 3.07 (d,  $J = 13.7$  Hz, 1H), 1.72 (s, 3H);  $^{13}\text{C}\{^1\text{H}\}$  NMR (151 MHz,  $\text{CDCl}_3$ )  $\delta$  149.0, 136.2, 135.4, 135.0, 131.0, 130.7 (q,  $J_{\text{C-F}} = 31.8$  Hz), 130.0, 128.6, 127.9, 127.8, 127.6, 127.0, 126.4, 125.0 (q,  $J_{\text{C-F}} = 4.3$  Hz), 124.5, 124.1 (q,  $J_{\text{C-F}} = 271.7$  Hz), 123.7, 121.8 (q,  $J_{\text{C-F}} = 4.3$  Hz), 101.2, 81.1, 45.1, 24.4; IR (neat): 3064, 3028, 2984, 1487, 1450, 1333, 1164, 1121, 1072, 748, 722, 694  $\text{cm}^{-1}$ ; HRMS (FD)  $m/z$ :  $[\text{M}]^+$  Calcd for  $\text{C}_{24}\text{H}_{19}\text{F}_3\text{O}$  380.1384; Found 380.1387.



1-Benzyl-1-methyl-3-(*o*-tolyl)-1*H*-isochromene (**3j**)

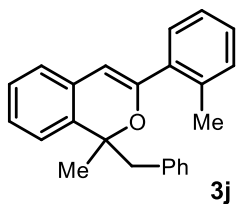

76% yield; Colorless oil;  $R_f = 0.53$  (Hexane/EtOAc = 10/1);  $^1\text{H NMR}$  (600 MHz,  $\text{CDCl}_3$ )  $\delta$  7.47-7.45 (m, 1H), 7.25-7.19 (m, 4H), 7.17-7.11 (m, 3H), 7.06-7.03 (m, 2H), 6.88-6.86 (m, 2H), 6.76 (d,  $J = 7.6$  Hz, 1H), 5.95 (s, 1H), 3.40 (d,  $J = 13.4$  Hz, 1H), 3.15 (d,  $J = 13.4$  Hz, 1H), 2.46 (s, 3H), 1.71 (s, 3H);  $^{13}\text{C}\{^1\text{H}\}$  NMR (151 MHz,  $\text{CDCl}_3$ )  $\delta$  152.8, 136.7, 136.4, 135.5, 133.2, 130.9, 130.8, 130.8, 128.7, 128.4,

127.7, 127.5, 126.2, 126.0, 125.6, 124.1, 123.7, 103.8, 81.5, 45.1, 25.0, 21.1; IR (neat): 3060, 3023, 2979, 2926, 1720, 1701, 1633, 1601, 1486, 1453, 1341, 1249, 1158, 1118, 1056, 1034, 759, 723  $\text{cm}^{-1}$ ; HRMS (APCI)  $m/z$ :  $[\text{M} + \text{H}]^+$  Calcd for  $\text{C}_{24}\text{H}_{23}\text{O}$  327.1743; Found 327.1743.

1-Benzyl-6-fluoro-1-methyl-3-phenyl-1*H*-isochromene (**3k**)

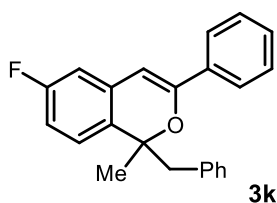

79% yield; White foam;  $R_f = 0.56$  (Hexane/EtOAc = 10/1);  $^1\text{H NMR}$  (600 MHz,  $\text{CDCl}_3$ )  $\delta$  7.72-7.71 (m, 2H), 7.40-7.36 (m, 3H), 7.20-7.16 (m, 3H), 6.92 (d,  $J = 6.5$  Hz, 2H), 6.81-6.75 (m, 3H), 6.39 (s, 1H), 3.18-3.13 (m, 2H), 1.71 (s, 3H).  $^{13}\text{C}\{^1\text{H}\}$  NMR (151 MHz,  $\text{CDCl}_3$ )  $\delta$  162.4 (d,  $J_{\text{C-F}} = 244.3$  Hz), 151.8, 136.3, 134.2, 132.9 (d,  $J_{\text{C-F}} = 8.6$  Hz), 131.0, 130.0, 129.0, 128.3, 127.6, 126.4, 125.5

(d,  $J_{\text{C-F}} = 8.6$  Hz), 125.2, 112.5 (d,  $J_{\text{C-F}} = 21.7$  Hz), 110.4 (d,  $J_{\text{C-F}} = 21.7$  Hz), 99.4, 81.0, 44.9, 24.7; IR (neat): 3086, 3061, 3030, 2983, 2937, 1726, 1633, 1607, 1582, 1491, 1450, 1344, 1227, 1146, 1059, 964, 863, 760  $\text{cm}^{-1}$ ; HRMS (APCI)  $m/z$ :  $[\text{M} + \text{H}]^+$  Calcd for  $\text{C}_{23}\text{H}_{20}\text{FO}$  331.1493; Found 331.1493.

1-Benzyl-7-fluoro-1-methyl-3-phenyl-1*H*-isochromene (**3l**)

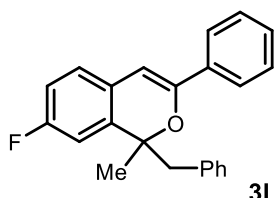

75% yield; White foam;  $R_f = 0.56$  (Hexane/EtOAc = 10/1);  $^1\text{H NMR}$  (600 MHz,  $\text{CDCl}_3$ )  $\delta$  7.70 (m, 2H), 7.39-7.34 (m, 3H), 7.21-7.17 (m, 3H), 7.07 (dd,  $J = 8.2$ , 5.8 Hz, 1H), 6.96-6.91 (m, 3H), 6.63 (dd,  $J = 9.5$ , 2.6 Hz, 1H), 6.44 (s, 1H), 3.19 (d,  $J = 13.7$  Hz, 1H), 3.10 (d,  $J = 13.7$  Hz, 1H), 1.69 (s, 3H).  $^{13}\text{C}\{^1\text{H}\}$  NMR (151 MHz,  $\text{CDCl}_3$ )  $\delta$  161.2 (d,  $J_{\text{C-F}} = 244.3$  Hz), 149.8, 136.7 (d,  $J_{\text{C-F}} =$

7.2 Hz), 136.1, 134.4, 131.0, 128.7, 128.2, 127.7, 126.9 (d,  $J_{\text{C-F}} = 3.0$  Hz), 126.5, 125.5 (d,  $J_{\text{C-F}} = 8.6$  Hz), 124.9, 114.4 (d,  $J_{\text{C-F}} = 21.7$  Hz), 111.3 (d,  $J_{\text{C-F}} = 24.6$  Hz), 99.2, 80.5, 44.6, 24.3; IR (neat): 3086, 3061, 3030, 2984, 2937, 1948, 1879, 1633, 1607, 1583, 1496, 1449, 1346, 1271, 1061, 829, 761  $\text{cm}^{-1}$ ; HRMS (APCI)  $m/z$ :  $[\text{M} + \text{H}]^+$  Calcd for  $\text{C}_{23}\text{H}_{20}\text{FO}$  331.1493; Found 331.1493.

1-Benzyl-1,3-diphenyl-1*H*-isochromene (**3m**)

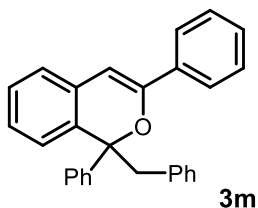

19% yield; White solid;  $R_f = 0.63$  (Hexane/EtOAc = 15/1); Mp: 155.4-156.8 °C;  $^1\text{H NMR}$  (600 MHz,  $\text{CDCl}_3$ )  $\delta$  7.72 (dt,  $J = 6.8, 1.5$  Hz, 2H), 7.50 (dd,  $J = 7.4, 1.5$  Hz, 1H), 7.38-7.35 (m, 2H), 7.34-7.26 (m, 4H), 7.19-7.11 (m, 6H), 7.10-7.06 (m, 4H), 6.37 (s, 1H), 3.76 (d,  $J = 14.1$  Hz, 1H), 3.69 (d,  $J = 14.1$  Hz, 1H);  $^{13}\text{C}\{^1\text{H}\}$  NMR (151 MHz,  $\text{CDCl}_3$ )  $\delta$  151.0, 143.0, 136.2, 134.2, 133.1, 131.5, 131.3, 128.6, 128.3, 128.0, 127.5, 127.4, 127.2, 126.3, 126.2, 126.2, 124.8, 124.6, 101.1, 83.9, 46.6; IR (neat): 3061, 3029, 2923, 2851, 1735, 1653, 1633, 1066, 1495, 1454, 1346, 1065, 1027, 794, 764  $\text{cm}^{-1}$ ; HRMS (APCI)  $m/z$ :  $[\text{M} + \text{H}]^+$  Calcd for  $\text{C}_{28}\text{H}_{23}\text{O}$  375.1743; Found 375.1744.

1-Benzyl-3-phenyl-1*H*-isochromene (**3n**)

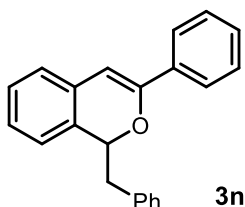

72% yield; White solid;  $R_f = 0.63$  (Hexane/EtOAc = 15/1); Mp: 103.9-104.8 °C;  $^1\text{H NMR}$  (600 MHz,  $\text{CDCl}_3$ )  $\delta$  7.60-7.58 (m, 2H), 7.34-7.27 (m, 6H), 7.24 (m, 2H), 7.17-7.11 (m, 4H), 6.91-6.89 (m, 1H), 6.49 (s, 1H), 5.52 (dd,  $J = 9.0, 5.2$  Hz, 1H), 3.31 (dd,  $J = 13.8, 9.0$  Hz, 1H), 3.05 (dd,  $J = 13.8, 5.2$  Hz, 1H);  $^{13}\text{C}\{^1\text{H}\}$  NMR (151 MHz,  $\text{CDCl}_3$ )  $\delta$  151.0, 137.5, 134.3, 130.8, 130.8, 129.8, 128.7, 128.2, 128.1, 126.4, 126.2, 125.1, 124.3, 124.0, 100.2, 79.1, 40.5; IR (neat): 3062, 3028, 2922, 2850, 1630, 1604, 1569, 1495, 1454, 1375, 1280, 1064, 1030, 795, 765  $\text{cm}^{-1}$ ; HRMS (APCI)  $m/z$ :  $[\text{M} + \text{H}]^+$  Calcd for  $\text{C}_{22}\text{H}_{19}\text{O}$  299.1430; Found 299.1430.

1-Benzyl-3-(*p*-tolyl)-1*H*-isochromene (**3o**)

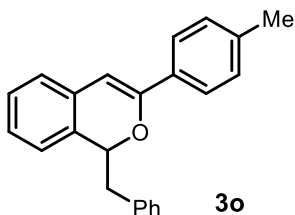

82% yield; White solid;  $R_f = 0.56$  (Hexane/EtOAc = 15/1); Mp: 122.2-123.2 °C;  $^1\text{H NMR}$  (600 MHz,  $\text{CDCl}_3$ )  $\delta$  7.48 (d,  $J = 7.9$  Hz, 2H), 7.30-7.22 (m, 4H), 7.17-7.09 (m, 6H), 6.89 (d,  $J = 7.9$  Hz, 1H), 6.44 (s, 1H), 5.49 (dd,  $J = 9.1, 5.3$  Hz, 1H), 3.30 (dd,  $J = 14.0, 9.1$  Hz, 1H), 3.04 (dd,  $J = 14.0, 5.3$  Hz, 1H), 2.36 (s, 3H);  $^{13}\text{C}\{^1\text{H}\}$  NMR (151 MHz,  $\text{CDCl}_3$ )  $\delta$  151.2, 138.7, 137.6, 131.5, 130.9, 130.8, 129.8, 128.9, 128.2, 128.0, 126.4, 126.0, 125.1, 124.2, 123.8, 99.4, 79.1, 40.4, 21.3; IR (neat): 3064, 3029, 2945, 2917, 1626, 1604, 1510, 1488, 1454, 1375, 1275, 1183, 1064, 800, 751  $\text{cm}^{-1}$ ; HRMS (APCI)  $m/z$ :  $[\text{M} + \text{H}]^+$  Calcd for  $\text{C}_{23}\text{H}_{21}\text{O}$  313.1587; Found 313.1587.

1-Benzyl-3-(4-bromophenyl)-1*H*-isochromene (**3p**)

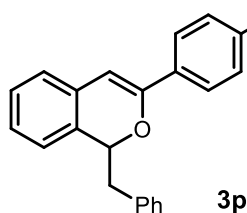

75% yield; White solid;  $R_f = 0.67$  (Hexane/EtOAc = 15/1); Mp: 92.4-93.8 °C;  $^1\text{H NMR}$  (600 MHz,  $\text{CDCl}_3$ )  $\delta$  7.45-7.39 (m, 4H), 7.29-7.23 (m, 4H), 7.18-7.12 (m, 4H), 6.93 (t,  $J = 7.9$  Hz, 1H), 6.46 (s, 1H), 5.50 (dd,  $J =$  dd, 9.3, 5.2 Hz, 1H), 3.27 (dd,  $J = 14.1, 9.3$  Hz, 1H), 3.01 (dd,  $J = 14.1, 5.2$  Hz, 1H);  $^{13}\text{C}\{^1\text{H}\}$  NMR (151 MHz,  $\text{CDCl}_3$ )  $\delta$  149.9, 137.3, 133.2, 131.3, 130.9, 130.4, 129.7, 128.2, 128.1, 126.6, 126.6, 126.5, 124.2, 124.1, 122.7, 100.6, 79.1, 40.5; IR (neat): 3060, 3028, 2945, 2916, 1726, 1627, 1602, 1587, 1560, 1488, 1454, 1401, 1270, 1179, 1070, 1008, 795, 752  $\text{cm}^{-1}$ ; HRMS (APCI)  $m/z$ :  $[\text{M} + \text{H}]^+$  Calcd for  $\text{C}_{22}\text{H}_{18}\text{BrO}$  377.0536; Found 377.0536.

1-Benzyl-3-(4-(trifluoromethyl)phenyl)-1*H*-isochromene (**3q**)

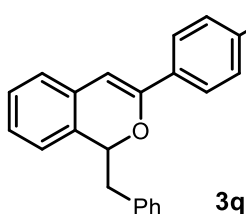

63% yield; White solid;  $R_f = 0.49$  (Hexane/EtOAc = 15/1) ; Mp:97.0-97.8 °C;  $^1\text{H NMR}$  (600 MHz,  $\text{CDCl}_3$ )  $\delta$  7.65 (d,  $J = 8.2$  Hz, 2H), 7.56 (d,  $J = 8.6$  Hz, 2H), 7.30-7.25 (m, 4H), 7.19-7.14 (m, 4H), 6.95 (d,  $J = 7.6$  Hz, 1H), 6.56 (s, 1H), 5.54 (dd,  $J = 9.3, 5.0$  Hz, 1H), 3.28 (dd,  $J = 13.8, 9.3$  Hz, 1H), 3.04 (dd,  $J = 13.8, 5.0$  Hz, 1H);  $^{13}\text{C}\{^1\text{H}\}$  NMR (151 MHz,  $\text{CDCl}_3$ )  $\delta$  149.5, 137.7, 137.3, 131.0, 130.1<sub>2</sub>, 130.1<sub>0</sub> (q,  $J_{\text{C-F}} = 32.6$  Hz), 129.9, 129.7, 128.3, 128.2, 127.0, 126.5, 125.1, 124.4, 124.3, 124.1 (q,  $J_{\text{C-F}} = 272.1$  Hz), 102.1, 79.2, 40.6; IR (neat): 3068, 3029, 2946, 2915, 1616, 1487, 1455, 1414, 1325, 1167, 1125, 1112, 1069, 1014, 853, 795, 752  $\text{cm}^{-1}$ ; HRMS (APCI)  $m/z$ :  $[\text{M} + \text{H}]^+$  Calcd for  $\text{C}_{23}\text{H}_{18}\text{F}_3\text{O}$  367.1304; Found 367.1304.

1-Benzyl-3-(*o*-tolyl)-1*H*-isochromene (**3r**)

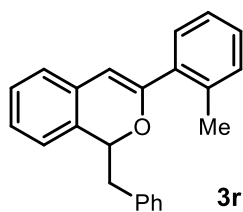

73% yield; White solid;  $R_f = 0.40$  (Hexane/EtOAc = 15/1); Mp: 83.0- 84.5 °C ;  $^1\text{H NMR}$  (600 MHz,  $\text{CDCl}_3$ )  $\delta$  7.38 (d,  $J = 7.2$  Hz, 1H), 7.26-7.22 (m, 5H), 7.18-7.13 (m, 4H), 7.09 (dd,  $J = 12.7, 7.6$  Hz, 2H), 6.82 (d,  $J = 7.6$  Hz, 1H), 6.01 (s, 1H), 5.49-5.44 (m, 1H), 3.36-3.31 (m, 2H), 2.28 (s, 3H);  $^{13}\text{C}\{^1\text{H}\}$  NMR (151 MHz,  $\text{CDCl}_3$ )  $\delta$  153.9, 137.5, 136.7, 135.1, 131.2, 130.7, 129.9, 129.7, 128.9, 128.6, 128.2, 128.0, 126.4, 126.1, 125.5, 124.2, 123.6, 104.4, 79.0, 39.9, 20.8. IR (neat): 3063, 3029, 2959, 2871, 1729, 1630, 1604, 1542, 1488, 1455, 1375, 1270, 1119, 1063, 795, 762  $\text{cm}^{-1}$ ; HRMS (APCI)  $m/z$ :  $[\text{M} + \text{H}]^+$  Calcd for  $\text{C}_{23}\text{H}_{21}\text{O}$  313.1587; Found 313.1587.

1-Methyl-3-phenyl-1-(4-(trifluoromethyl)benzyl)-1*H*-isochromene (**3s**)

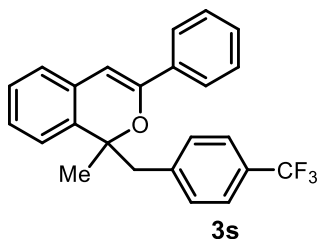

50% yield; White foam;  $R_f = 0.66$  (Hexane/EtOAc = 5/1);  $^1\text{H NMR}$  (600 MHz,  $\text{CDCl}_3$ )  $\delta$  7.70-7.68 (m, 2H), 7.42-7.34 (m, 5H), 7.25-7.23 (m, 1H), 7.14-7.11 (m, 2H), 7.06 (d,  $J = 7.9$  Hz, 2H), 6.93 (d,  $J = 7.2$  Hz, 1H), 6.46 (s, 1H), 3.29 (d,  $J = 13.4$  Hz, 1H), 3.16 (d,  $J = 13.4$  Hz, 1H), 1.71 (s, 3H);  $^{13}\text{C}\{^1\text{H}\}$  NMR (151 MHz,  $\text{CDCl}_3$ )  $\delta$  150.4, 140.7, 134.4, 134.1, 131.3, 130.6, 128.8, 128.6 (q,  $J_{\text{C-F}} = 30.0$  Hz), 128.3, 128.0, 126.5, 124.9, 124.5 (q,  $J_{\text{C-F}} = 4.4$  Hz), 124.34 (q,  $J_{\text{C-F}} = 270.0$  Hz), 124.33, 123.6, 100.2, 80.6, 44.8, 24.6; IR (neat): 3069, 3032, 2925, 2854, 1712, 1613, 1493, 1442, 1325, 1274, 1164, 1122, 1066, 1019, 849, 793  $\text{cm}^{-1}$ ; HRMS (FD)  $m/z$ :  $[\text{M} + \text{H}]^+$  Calcd for  $\text{C}_{24}\text{H}_{20}\text{F}_3\text{O}$  381.1461; Found 381.1461.

1-(4-Methoxybenzyl)-1-methyl-3-phenyl-1*H*-isochromene (**3t**)

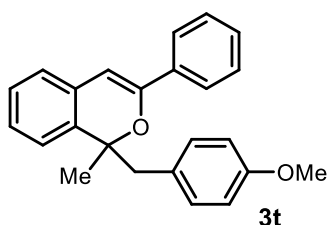

78% yield; White foam;  $R_f = 0.60$  (Hexane/EtOAc = 5/1);  $^1\text{H NMR}$  (600 MHz,  $\text{CDCl}_3$ )  $\delta$  7.72 (d,  $J = 7.9$  Hz, 2H), 7.39-7.34 (m, 3H), 7.22 (t,  $J = 7.4$  Hz, 1H), 7.10 (t,  $J = 7.2$  Hz, 2H), 6.88 (m, 3H), 6.71 (d,  $J = 8.2$  Hz, 2H), 6.46 (s, 1H), 3.77 (s, 3H), 3.15 (d,  $J = 13.7$  Hz, 1H), 3.06 (d,  $J = 13.7$  Hz, 1H), 1.69 (s, 3H);  $^{13}\text{C}\{^1\text{H}\}$  NMR (151 MHz,  $\text{CDCl}_3$ )  $\delta$  158.1, 150.5, 134.7, 134.6, 132.0, 130.6, 128.6, 128.6, 128.2, 127.6, 126.3, 125.0, 124.1, 123.8, 113.0, 100.0, 80.9, 55.2, 43.9, 24.4; IR (neat): 3064, 3032, 2953, 2834, 1730, 1716, 1699, 1685, 1651, 1631, 1558, 1541, 1508, 1457, 1247, 795, 669, 656  $\text{cm}^{-1}$ ; HRMS (FD)  $m/z$ :  $[\text{M} + \text{H}]^+$  Calcd for  $\text{C}_{24}\text{H}_{23}\text{O}$  343.1693; Found 343.1693.

## 6. Catalytic cycles of the sequential transformation and theoretical studies

### Catalytic cycles of the sequential transformation

As shown in Figure S3, the reported reaction is composed of three catalytic cycles, namely, catalytic cycles I and II and a photoredox cycle of the photocatalyst, 2-benzopyrylium cation. Catalytic cycle I generates 2-benzopyrylium cations **A** in situ from *ortho*-carbonyl alkynylbenzene derivatives **1** through the activation of alkyne moiety of **1** by  $\pi$ -Lewis acidic metal catalyst ([M]X: AgNTf<sub>2</sub> or Cu(NTf<sub>2</sub>)<sub>2</sub>) followed by the intramolecular cyclization and the proto-demetalation by trifluoroacetic acid (TFA). In catalytic cycle II, photo-excitation of generated **A** under light irradiation facilitates the single-electron transfer (SET) from benzyltrimethylsilane derivatives **2** as a donor molecule, resulting in the formation of radical cations **B**. Further desilylation from generated radical cations **B** affords nucleophilic arylmethyl radicals **C** which undergo addition reaction with 2-benzopyrylium intermediates **A**, giving radical cations **E**. Further reduction of radical cations **E** by SET from radical intermediates **D**, a reduced form of the photocatalyst, gives rise to corresponding 1*H*-isochromene derivatives **3**, which completes the photoredox cycle with the regeneration of cations **A**. The most distinctive feature of this sequential transformation is that the in situ-generated 2-benzopyrylium cations **A** are used not only as the electrophilic substrate but also as the photoredox catalyst.

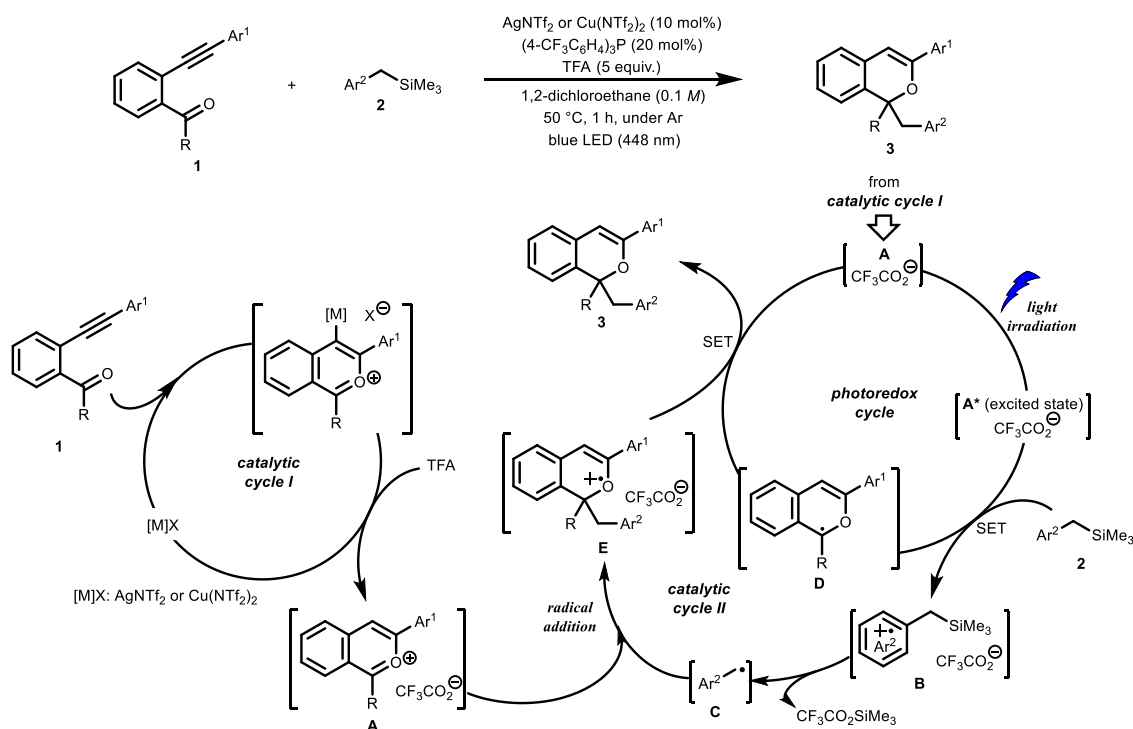

Figure S3. Plausible catalytic cycles

### Theoretical studies of the sequential transformation

DFT calculation was conducted to determine the actual reaction pathway in the carbon–carbon bond-formation step. All calculations were performed with the Gaussian 16 package (Revision B.01). Geometries were optimized and characterized using frequency calculations at the UM06-2X/6-31G(d,p) level. Gibbs free energies in the solution phase were calculated using single-point energy calculations at the UM06-2X/6-311+G(d,p) level according to the SMD solvation model (dichloroethane:  $\epsilon = 10.125$ ) for the optimized structures.

First, we considered the radical addition pathway, of which mechanism was proposed in our previous paper.<sup>10</sup> As shown in Figure S4, the energy profile for the radical addition of benzyl radical **C** to 2-benzopyrylium intermediate **A** was identified. The radical addition pathway exhibits an energy barrier of **TS-1** ( $\Delta G^\ddagger = +10.4$  kcal/mol). On the other hand, as shown in Figure S5, the energy profile for the radical coupling of radical **D**, generated by a single electron reduction of 2-benzopyrylium, with benzyl radical **C** exhibited the energy barrier of **TS-2** ( $\Delta G^\ddagger = +30.6$  kcal/mol) which is much larger than that of **TS-1** ( $\Delta G^\ddagger = +10.4$  kcal/mol). These results strongly suggest that the radical addition (Figure S4) is plausible for the present reaction and the radical coupling (Figure S5) is unfavorable. In addition, the addition of benzyl radical **C** to 2-benzopyrylium intermediate **A** through **TS-1** generates benzylated radical cation **E** (Figure S4). As shown in Figure S6, SET from radical **D** to radical cation **E** gives product **3a** along with the generation of 2-benzopyrylium **A**. The process is exergonic by 37.8 kcal/mol and therefore thermodynamically favorable. From the above theoretical studies, we proposed a mechanism for the present radical addition pathway (Figures S3 and S4).

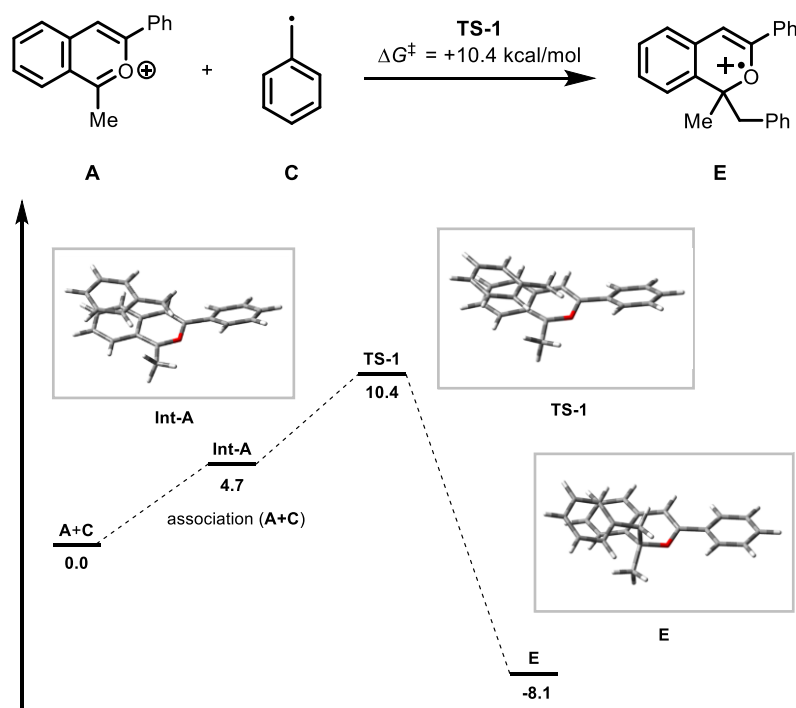

**Figure S4.** Radical addition pathway

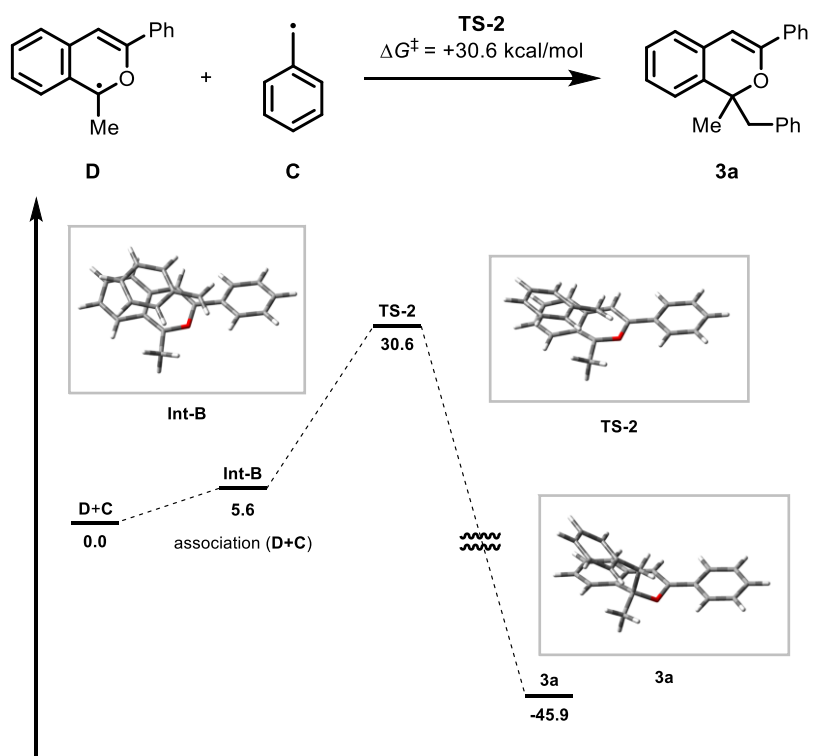

Figure S5. Radical coupling pathway

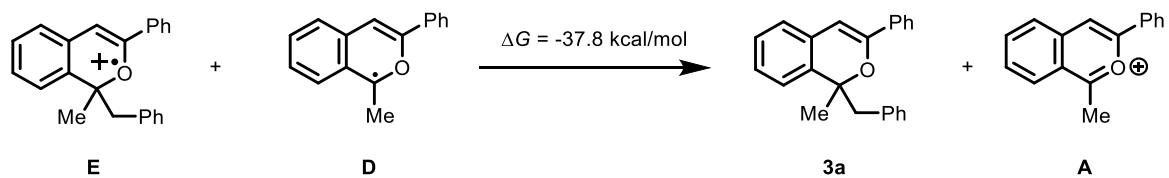

Figure S6. Electron transfer process

## Cartesian coordinates

### A

UM062X/6-31g(d,p)  
 E(UM062X) = -692.249135 hartree  
 Zero-point Energy Correction = 0.246496 hartree  
 Thermal Correction to Energy = 0.259762 hartree  
 Thermal correction to Enthalpy = 0.260706 hartree  
 Thermal correction to Gibbs Free Energy = 0.205908 hartree  
 Sum of electronic and Zero-point Energies = -692.002639 hartree  
 Sum of electronic and thermal Energies = -691.989373 hartree  
 Sum of electronic and thermal Enthalpies = -691.988429 hartree  
 Sum of electronic and thermal Free Energies = -692.043227 hartree  
 SMD(dichloroethane)/UM062X/6-311+g(d,p)  
 E(UM062X) = -692.482580 hartree  
 Gibbs Free Energy in dichloroethane = -692.276672 hartree  
 The number of Imaginary frequencies = 0

| Center Number | Atomic Number | Atomic Type | Coordinates (Angstroms) |           |           |
|---------------|---------------|-------------|-------------------------|-----------|-----------|
|               |               |             | X                       | Y         | Z         |
| 1             | 6             | 0           | 0.275079                | -1.152061 | -0.096002 |
| 2             | 6             | 0           | 1.671383                | -0.918174 | -0.071426 |
| 3             | 6             | 0           | -0.601271               | -0.110987 | -0.002292 |
| 4             | 6             | 0           | 2.620682                | -1.961602 | -0.161263 |
| 5             | 6             | 0           | 2.138855                | 0.427582  | 0.037051  |
| 6             | 6             | 0           | 3.961686                | -1.667049 | -0.136306 |
| 7             | 1             | 0           | 2.276817                | -2.986668 | -0.247302 |
| 8             | 6             | 0           | 3.535815                | 0.705292  | 0.059989  |
| 9             | 6             | 0           | 4.425954                | -0.328888 | -0.024380 |
| 10            | 1             | 0           | 3.883787                | 1.729000  | 0.143591  |
| 11            | 1             | 0           | 4.687192                | -2.471067 | -0.203468 |
| 12            | 1             | 0           | 5.492045                | -0.134286 | -0.007743 |
| 13            | 1             | 0           | -0.105633               | -2.159254 | -0.212107 |
| 14            | 8             | 0           | -0.097149               | 1.152760  | 0.092033  |
| 15            | 6             | 0           | 1.183441                | 1.445043  | 0.109624  |
| 16            | 6             | 0           | -2.061247               | -0.158393 | -0.000889 |
| 17            | 6             | 0           | -2.716275               | -1.350899 | 0.336712  |
| 18            | 6             | 0           | -2.809656               | 0.976060  | -0.343027 |
| 19            | 6             | 0           | -4.102407               | -1.407736 | 0.320228  |
| 20            | 1             | 0           | -2.148830               | -2.224246 | 0.641501  |
| 21            | 6             | 0           | -4.196067               | 0.909587  | -0.358248 |
| 22            | 1             | 0           | -2.308286               | 1.899511  | -0.608801 |
| 23            | 6             | 0           | -4.843334               | -0.279860 | -0.029350 |
| 24            | 1             | 0           | -4.606086               | -2.329040 | 0.590056  |
| 25            | 1             | 0           | -4.772977               | 1.786168  | -0.630622 |
| 26            | 1             | 0           | -5.926834               | -0.327136 | -0.040792 |
| 27            | 6             | 0           | 1.464313                | 2.903135  | 0.213066  |
| 28            | 1             | 0           | 2.058860                | 3.109421  | 1.107425  |
| 29            | 1             | 0           | 2.035659                | 3.239509  | -0.656793 |
| 30            | 1             | 0           | 0.529768                | 3.459277  | 0.267887  |

### C

UM062X/6-31g(d,p)  
 E(UM062X) = -270.788424 hartree  
 Zero-point Energy Correction = 0.115638 hartree  
 Thermal Correction to Energy = 0.121302 hartree  
 Thermal correction to Enthalpy = 0.122246 hartree  
 Thermal correction to Gibbs Free Energy = 0.085981 hartree  
 Sum of electronic and Zero-point Energies = -270.672786 hartree  
 Sum of electronic and thermal Energies = -270.667122 hartree  
 Sum of electronic and thermal Enthalpies = -270.666178 hartree  
 Sum of electronic and thermal Free Energies = -270.702443 hartree  
 SMD(dichloroethane)/UM062X/6-311+g(d,p)  
 E(UM062X) = -270.862174 hartree  
 Gibbs Free Energy in dichloroethane = -270.776193 hartree  
 The number of Imaginary frequencies = 0

| Center Number | Atomic Number | Atomic Type | Coordinates (Angstroms) |           |           |
|---------------|---------------|-------------|-------------------------|-----------|-----------|
|               |               |             | X                       | Y         | Z         |
| 1             | 6             | 0           | 1.834112                | 0.000000  | -0.000010 |
| 2             | 6             | 0           | 1.131214                | 1.207826  | -0.000005 |
| 3             | 6             | 0           | -0.252233               | 1.213017  | 0.000003  |
| 4             | 6             | 0           | -0.987538               | 0.000000  | 0.000005  |
| 5             | 6             | 0           | -0.252233               | -1.213017 | 0.000000  |
| 6             | 6             | 0           | 1.131214                | -1.207826 | -0.000008 |
| 7             | 1             | 0           | 2.918811                | 0.000000  | -0.000016 |
| 8             | 1             | 0           | 1.672824                | 2.148491  | -0.000006 |
| 9             | 1             | 0           | -0.795455               | 2.153811  | 0.000007  |
| 10            | 1             | 0           | -0.795455               | -2.153811 | 0.000002  |
| 11            | 1             | 0           | 1.672824                | -2.148491 | -0.000012 |
| 12            | 6             | 0           | -2.398224               | 0.000000  | 0.000013  |
| 13            | 1             | 0           | -2.955650               | 0.928245  | 0.000017  |
| 14            | 1             | 0           | -2.955650               | -0.928245 | 0.000015  |

### D

UM062X/6-31g(d,p)  
 E(UM062X) = -692.440925 hartree  
 Zero-point Energy Correction = 0.243583 hartree

Thermal Correction to Energy = 0.257277 hartree  
 Thermal correction to Enthalpy = 0.258221 hartree  
 Thermal correction to Gibbs Free Energy = 0.201341 hartree  
 Sum of electronic and Zero-point Energies = -692.197342 hartree  
 Sum of electronic and thermal Energies = -692.183648 hartree  
 Sum of electronic and thermal Enthalpies = -692.182704 hartree  
 Sum of electronic and thermal Free Energies = -692.239584 hartree  
 SMD(dichloroethane)/UM062X/6-311+g(d,p)  
 E(UM062X) = -692.622321 hartree  
 Gibbs Free Energy in dichloroethane = -692.420980 hartree  
 The number of Imaginary frequencies = 0

| Center Number | Atomic Number | Atomic Type | Coordinates (Angstroms) |           |           |
|---------------|---------------|-------------|-------------------------|-----------|-----------|
|               |               |             | X                       | Y         | Z         |
| 1             | 6             | 0           | 0.257809                | -1.120418 | -0.079036 |
| 2             | 6             | 0           | 1.688747                | -0.918772 | -0.065115 |
| 3             | 6             | 0           | -0.593197               | -0.080531 | 0.016335  |
| 4             | 6             | 0           | 2.607768                | -1.959056 | -0.151710 |
| 5             | 6             | 0           | 2.144695                | 0.434165  | 0.033513  |
| 6             | 6             | 0           | 3.977899                | -1.704335 | -0.141186 |
| 7             | 1             | 0           | 2.240307                | -2.978902 | -0.227951 |
| 8             | 6             | 0           | 3.545938                | 0.673613  | 0.039080  |
| 9             | 6             | 0           | 4.433241                | -0.382350 | -0.045579 |
| 10            | 1             | 0           | 3.914837                | 1.691635  | 0.108165  |
| 11            | 1             | 0           | 4.686093                | -2.522423 | -0.207842 |
| 12            | 1             | 0           | 5.500219                | -0.181914 | -0.039549 |
| 13            | 1             | 0           | -0.139793               | -2.122109 | -0.191973 |
| 14            | 8             | 0           | -0.141987               | 1.207511  | 0.108420  |
| 15            | 6             | 0           | 1.207946                | 1.466383  | 0.113922  |
| 16            | 6             | 0           | -2.064431               | -0.157096 | 0.008463  |
| 17            | 6             | 0           | -2.723653               | -1.345523 | 0.346071  |
| 18            | 6             | 0           | -2.824935               | 0.964778  | -0.340156 |
| 19            | 6             | 0           | -4.110004               | -1.416119 | 0.310899  |
| 20            | 1             | 0           | -2.149637               | -2.210545 | 0.661821  |
| 21            | 6             | 0           | -4.213124               | 0.890507  | -0.370883 |
| 22            | 1             | 0           | -2.319034               | 1.889702  | -0.591414 |
| 23            | 6             | 0           | -4.860748               | -0.298941 | -0.050008 |
| 24            | 1             | 0           | -4.607081               | -2.342680 | 0.579015  |
| 25            | 1             | 0           | -4.790720               | 1.766394  | -0.648138 |
| 26            | 1             | 0           | -5.944135               | -0.354376 | -0.072427 |
| 27            | 6             | 0           | 1.518603                | 2.920246  | 0.214583  |
| 28            | 1             | 0           | 2.165276                | 3.133352  | 1.073146  |
| 29            | 1             | 0           | 2.032253                | 3.289740  | -0.681054 |
| 30            | 1             | 0           | 0.591986                | 3.482741  | 0.335680  |

### Int-A

UM062X/6-31g(d,p)  
 E(UM062X) = -963.058270 hartree  
 Zero-point Energy Correction = 0.363392 hartree  
 Thermal Correction to Energy = 0.383945 hartree  
 Thermal correction to Enthalpy = 0.384889 hartree  
 Thermal correction to Gibbs Free Energy = 0.312237 hartree  
 Sum of electronic and Zero-point Energies = -962.694878 hartree  
 Sum of electronic and thermal Energies = -962.674324 hartree  
 Sum of electronic and thermal Enthalpies = -962.673380 hartree  
 Sum of electronic and thermal Free Energies = -962.746033 hartree  
 SMD(dichloroethane)/UM062X/6-311+g(d,p)  
 E(UM062X) = -963.357675 hartree  
 Gibbs Free Energy in dichloroethane = -963.045438 hartree  
 The number of Imaginary frequencies = 0

| Center Number | Atomic Number | Atomic Type | Coordinates (Angstroms) |           |           |
|---------------|---------------|-------------|-------------------------|-----------|-----------|
|               |               |             | X                       | Y         | Z         |
| 1             | 6             | 0           | -1.014316               | 1.479834  | -0.231631 |
| 2             | 6             | 0           | 0.335332                | 1.642572  | 0.177107  |
| 3             | 6             | 0           | -1.770387               | 0.464439  | 0.270506  |
| 4             | 6             | 0           | 1.156883                | 2.688450  | -0.295237 |
| 5             | 6             | 0           | 0.887491                | 0.692467  | 1.085042  |
| 6             | 6             | 0           | 2.464498                | 2.770037  | 0.122710  |
| 7             | 1             | 0           | 0.744705                | 3.419902  | -0.982200 |
| 8             | 6             | 0           | 2.246511                | 0.788720  | 1.489357  |
| 9             | 6             | 0           | 3.016867                | 1.816237  | 1.013656  |
| 10            | 1             | 0           | 2.666271                | 0.051146  | 2.163938  |
| 11            | 1             | 0           | 3.091971                | 3.577709  | -0.240157 |
| 12            | 1             | 0           | 4.055917                | 1.900123  | 1.310467  |
| 13            | 1             | 0           | -1.448242               | 2.152953  | -0.961073 |
| 14            | 8             | 0           | -1.199467               | -0.404007 | 1.152478  |
| 15            | 6             | 0           | 0.062298                | -0.351433 | 1.520844  |
| 16            | 6             | 0           | -3.166637               | 0.150626  | -0.031817 |
| 17            | 6             | 0           | -4.020869               | 1.156855  | -0.501302 |
| 18            | 6             | 0           | -3.648590               | -1.154991 | 0.128628  |
| 19            | 6             | 0           | -5.338339               | 0.855164  | -0.816762 |
| 20            | 1             | 0           | -3.667576               | 2.179214  | -0.590369 |
| 21            | 6             | 0           | -4.967840               | -1.448402 | -0.189861 |
| 22            | 1             | 0           | -2.988775               | -1.936824 | 0.489124  |
| 23            | 6             | 0           | -5.812430               | -0.446645 | -0.663955 |
| 24            | 1             | 0           | -5.999352               | 1.637985  | -1.171303 |
| 25            | 1             | 0           | -5.337258               | -2.460852 | -0.071261 |
| 26            | 1             | 0           | -6.842890               | -0.679135 | -0.909834 |
| 27            | 6             | 0           | 0.469360                | -1.438363 | 2.449195  |





|    |   |   |           |           |           |
|----|---|---|-----------|-----------|-----------|
| 19 | 6 | 0 | -4.882570 | 1.093750  | -0.847698 |
| 20 | 1 | 0 | -3.113407 | 2.300091  | -0.947928 |
| 21 | 6 | 0 | -4.681112 | -0.990182 | 0.340766  |
| 22 | 1 | 0 | -2.727479 | -1.427965 | 1.139259  |
| 23 | 6 | 0 | -5.457575 | -0.085545 | -0.377535 |
| 24 | 1 | 0 | -5.484483 | 1.812661  | -1.393953 |
| 25 | 1 | 0 | -5.122819 | -1.907635 | 0.716163  |
| 26 | 1 | 0 | -6.506354 | -0.292449 | -0.563459 |
| 27 | 6 | 0 | 0.888364  | -1.023850 | 2.681169  |
| 28 | 1 | 0 | 1.917278  | -1.364935 | 2.547241  |
| 29 | 1 | 0 | 0.781634  | -0.629520 | 3.699566  |
| 30 | 1 | 0 | 0.227951  | -1.890839 | 2.585990  |
| 31 | 6 | 0 | 3.476663  | -1.197290 | -1.226902 |
| 32 | 6 | 0 | 2.462044  | -0.614935 | -1.988330 |
| 33 | 6 | 0 | 1.148739  | -1.026687 | -1.837032 |
| 34 | 6 | 0 | 0.802672  | -2.038464 | -0.906738 |
| 35 | 6 | 0 | 1.853159  | -2.626564 | -0.154971 |
| 36 | 6 | 0 | 3.162041  | -2.207484 | -0.311905 |
| 37 | 1 | 0 | 4.501564  | -0.858915 | -1.335741 |
| 38 | 1 | 0 | 2.700219  | 0.179310  | -2.688589 |
| 39 | 1 | 0 | 0.357610  | -0.559768 | -2.417361 |
| 40 | 1 | 0 | 1.610784  | -3.410279 | 0.558454  |
| 41 | 1 | 0 | 3.949061  | -2.665754 | 0.279616  |
| 42 | 6 | 0 | -0.540923 | -2.432823 | -0.722815 |
| 43 | 1 | 0 | -1.340577 | -1.978209 | -1.295101 |
| 44 | 1 | 0 | -0.800926 | -3.210277 | -0.014043 |

|    |   |   |          |           |           |
|----|---|---|----------|-----------|-----------|
| 33 | 6 | 0 | 2.822824 | -0.318771 | -1.280116 |
| 34 | 6 | 0 | 2.115260 | -1.409424 | -0.731410 |
| 35 | 6 | 0 | 2.855774 | -2.503514 | -0.233907 |
| 36 | 6 | 0 | 4.240217 | -2.512763 | -0.300247 |
| 37 | 1 | 0 | 6.006470 | -1.437864 | -0.908549 |
| 38 | 1 | 0 | 4.736535 | 0.514555  | -1.767286 |
| 39 | 1 | 0 | 2.265245 | 0.543408  | -1.639068 |
| 40 | 1 | 0 | 2.322182 | -3.348572 | 0.194053  |
| 41 | 1 | 0 | 4.794113 | -3.365741 | 0.078524  |
| 42 | 6 | 0 | 0.689574 | -1.360459 | -0.611203 |
| 43 | 1 | 0 | 0.131011 | -0.660001 | -1.227216 |
| 44 | 1 | 0 | 0.155141 | -2.258048 | -0.313142 |

**3a**  
UM062X/6-31g(d,p)  
E(UM062X) = -963.340849 hartree  
Zero-point Energy Correction = 0.368054 hartree  
Thermal Correction to Energy = 0.386997 hartree  
Thermal correction to Enthalpy = 0.387942 hartree  
Thermal correction to Gibbs Free Energy = 0.319823 hartree  
Sum of electronic and Zero-point Energies = -962.972796 hartree  
Sum of electronic and thermal Energies = -962.953852 hartree  
Sum of electronic and thermal Enthalpies = -962.952908 hartree  
Sum of electronic and thermal Free Energies = -963.021027 hartree  
SMD(dichloroethane)/UM062X/6-311+g(d,p)  
E(UM062X) = -963.590130 hartree  
Gibbs Free Energy in dichloroethane = -963.270307 hartree  
The number of Imaginary frequencies = 0

**TS-2**

UM062X/6-31g(d,p)  
E(UM062X) = -963.205091 hartree  
Zero-point Energy Correction = 0.360291 hartree  
Thermal Correction to Energy = 0.380122 hartree  
Thermal correction to Enthalpy = 0.381066 hartree  
Thermal correction to Gibbs Free Energy = 0.309865 hartree  
Sum of electronic and Zero-point Energies = -962.844800 hartree  
Sum of electronic and thermal Energies = -962.824970 hartree  
Sum of electronic and thermal Enthalpies = -962.824025 hartree  
Sum of electronic and thermal Free Energies = -962.895226 hartree  
SMD(dichloroethane)/UM062X/6-311+g(d,p)  
E(UM062X) = -963.458304 hartree  
Gibbs Free Energy in dichloroethane = -963.148439 hartree  
The number of Imaginary frequencies = 1

| Center Number | Atomic Number | Atomic Type | Coordinates (Angstroms) |           |           |
|---------------|---------------|-------------|-------------------------|-----------|-----------|
|               |               |             | X                       | Y         | Z         |
| 1             | 6             | 0           | -1.249773               | 1.573223  | -0.340784 |
| 2             | 6             | 0           | 0.038550                | 1.913929  | 0.006686  |
| 3             | 6             | 0           | -1.879385               | 0.422433  | 0.181566  |
| 4             | 6             | 0           | 0.703859                | 3.101787  | -0.463038 |
| 5             | 6             | 0           | 0.780627                | 1.020109  | 0.889142  |
| 6             | 6             | 0           | 1.966487                | 3.396791  | -0.061641 |
| 7             | 1             | 0           | 0.163177                | 3.762773  | -1.134862 |
| 8             | 6             | 0           | 2.108105                | 1.365017  | 1.274181  |
| 9             | 6             | 0           | 2.682425                | 2.522707  | 0.835652  |
| 10            | 1             | 0           | 2.663754                | 0.697327  | 1.925458  |
| 11            | 1             | 0           | 2.450880                | 4.301511  | -0.414597 |
| 12            | 1             | 0           | 3.687921                | 2.784639  | 1.145085  |
| 13            | 1             | 0           | -1.808175               | 2.206376  | -1.020714 |
| 14            | 8             | 0           | -1.145021               | -0.400218 | 1.009210  |
| 15            | 6             | 0           | 0.197017                | -0.216089 | 1.189585  |
| 16            | 6             | 0           | -3.217523               | -0.032032 | -0.062589 |
| 17            | 6             | 0           | -4.133885               | 0.738835  | -0.815569 |
| 18            | 6             | 0           | -3.667878               | -1.271352 | 0.448736  |
| 19            | 6             | 0           | -5.421030               | 0.285313  | -1.048839 |
| 20            | 1             | 0           | -3.837475               | 1.704291  | -1.211330 |
| 21            | 6             | 0           | -4.959762               | -1.711195 | 0.207939  |
| 22            | 1             | 0           | -2.988101               | -1.879442 | 1.033652  |
| 23            | 6             | 0           | -5.850035               | -0.943177 | -0.542675 |
| 24            | 1             | 0           | -6.102210               | 0.899498  | -1.629911 |
| 25            | 1             | 0           | -5.277800               | -2.668019 | 0.611133  |
| 26            | 1             | 0           | -6.860014               | -1.292278 | -0.727413 |
| 27            | 6             | 0           | 0.728698                | -1.154043 | 2.233361  |
| 28            | 1             | 0           | 1.784148                | -1.371094 | 2.057792  |
| 29            | 1             | 0           | 0.618417                | -0.711635 | 3.228295  |
| 30            | 1             | 0           | 0.166011                | -2.088720 | 2.204846  |
| 31            | 6             | 0           | 4.922660                | -1.428570 | -0.857263 |
| 32            | 6             | 0           | 4.208682                | -0.333957 | -1.343972 |

| Center Number | Atomic Number | Atomic Type | Coordinates (Angstroms) |           |           |
|---------------|---------------|-------------|-------------------------|-----------|-----------|
|               |               |             | X                       | Y         | Z         |
| 1             | 6             | 0           | -1.282739               | 1.459615  | -0.531918 |
| 2             | 6             | 0           | 0.037057                | 1.934190  | -0.142461 |
| 3             | 6             | 0           | -1.825165               | 0.406355  | 0.108779  |
| 4             | 6             | 0           | 0.522820                | 3.189838  | -0.521422 |
| 5             | 6             | 0           | 0.824482                | 1.110246  | 0.681685  |
| 6             | 6             | 0           | 1.765657                | 3.628420  | -0.078942 |
| 7             | 1             | 0           | -0.088413               | 3.824246  | -1.157336 |
| 8             | 6             | 0           | 2.059739                | 1.563961  | 1.132485  |
| 9             | 6             | 0           | 2.532383                | 2.820203  | 0.756191  |
| 10            | 1             | 0           | 2.677402                | 0.926043  | 1.756722  |
| 11            | 1             | 0           | 2.133474                | 4.603860  | -0.380885 |
| 12            | 1             | 0           | 3.502993                | 3.157860  | 1.103681  |
| 13            | 1             | 0           | -1.847226               | 1.990449  | -1.288518 |
| 14            | 8             | 0           | -1.122818               | -0.294714 | 1.039463  |
| 15            | 6             | 0           | 0.317076                | -0.298121 | 0.934396  |
| 16            | 6             | 0           | -3.196183               | -0.103592 | -0.081942 |
| 17            | 6             | 0           | -4.208783               | 0.715816  | -0.595091 |
| 18            | 6             | 0           | -3.497496               | -1.428811 | 0.249802  |
| 19            | 6             | 0           | -5.486860               | 0.211442  | -0.797516 |
| 20            | 1             | 0           | -3.998311               | 1.758055  | -0.812219 |
| 21            | 6             | 0           | -4.779527               | -1.929418 | 0.050468  |
| 22            | 1             | 0           | -2.715570               | -2.056819 | 0.661425  |
| 23            | 6             | 0           | -5.776468               | -1.113847 | -0.477435 |
| 24            | 1             | 0           | -6.263718               | 0.857718  | -1.193074 |
| 25            | 1             | 0           | -5.000174               | -2.960543 | 0.307207  |
| 26            | 1             | 0           | -6.777053               | -1.504742 | -0.631084 |
| 27            | 6             | 0           | 0.785707                | -0.886424 | 2.255661  |
| 28            | 1             | 0           | 1.861639                | -1.069517 | 2.242919  |
| 29            | 1             | 0           | 0.543910                | -0.208616 | 3.077048  |
| 30            | 1             | 0           | 0.275251                | -1.838697 | 2.422083  |
| 31            | 6             | 0           | 4.915594                | -1.645660 | -0.907145 |
| 32            | 6             | 0           | 4.222153                | -0.576655 | -1.469742 |
| 33            | 6             | 0           | 2.851348                | -0.449148 | -1.269395 |
| 34            | 6             | 0           | 2.150841                | -1.385142 | -0.501750 |
| 35            | 6             | 0           | 2.857682                | -2.455222 | 0.053450  |
| 36            | 6             | 0           | 4.229373                | -2.586985 | -0.145074 |
| 37            | 1             | 0           | 5.984380                | -1.746950 | -1.066057 |
| 38            | 1             | 0           | 4.749453                | 0.159831  | -2.067713 |
| 39            | 1             | 0           | 2.313846                | 0.390657  | -1.703241 |
| 40            | 1             | 0           | 2.322385                | -3.194676 | 0.644557  |
| 41            | 1             | 0           | 4.760251                | -3.427089 | 0.291444  |
| 42            | 6             | 0           | 0.672466                | -1.227978 | -0.257308 |
| 43            | 1             | 0           | 0.185868                | -0.820023 | -1.149720 |
| 44            | 1             | 0           | 0.215214                | -2.201836 | -0.047584 |

## 7. References

- 1 N. Chernyak, S. I. Gorelsky, V. Gevorgyan, *Angew. Chem. Int. Ed.* **2011**, *50*, 2342–2345.
- 2 K. Saito, Y. Kajiwara, T. Akiyama, *Angew. Chem. Int. Ed.* **2013**, *52*, 13284–13288.
- 3 J. Sedelmeier, S. V. Ley, H. Lange, I. R. Baxendale. *Eur. J. Org. Chem.* **2009**, 4412–4420.
- 4 M. -E. Domaradzki, Y. Long, Z. She, X. Liu, G. Zhang, Y. Chen, *J. Org. Chem.* **2015**, *80*, 11360–11368.
- 5 M. Terada, F. Li, Y. Toda, *Angew. Chem. Int. Ed.* **2014**, *53*, 235–239.
- 6 N. Asao, K. Sato, *Org. Lett.* 2006, **8**, 5361–5363.
- 7 S. Bhunia, K.-C. Wang, R.-S. Liu, *Angew. Chem. Int. Ed.* **2008**, *47*, 5063–5066.
- 8 P. -C. Too, S. Chiba, *Chem. Commun.*, **2012**, *48*, 7634–7636.
- 9 N. Nardangeli, N. Topolovčan, R. Simionescu, T. Hudlický, *Eur. J. Org. Chem.* **2020**, 227–233.
- 10 M. Terada, R. Yazaki, R. Obayashi, Z. Iwasaki, S. Umemiya, J. Kikuchi, *Chem. Sci.* **2024**, *15*, 6115–6121.
